# Supplementary material for: Mild water-promoted selective deacetalisatison of acyclic acetals
Source: Royal Society of Chemistry journal article supplement (doi:10.1039/c0gc00280a), 2010-01-01

## Mild water-promoted deacetalisation of aromatic acyclic acetals

D. Bradley G. Williams,\* Adam Cullen, Alex Fourie, Hendrik Henning, Michelle Lawton, Wayne Mommsen, Portia Nangu, Jonathan Parker, Alicia Renison

Department of Chemistry, University of Johannesburg, P.O. Box 524, Auckland Park, 2006, South Africa; [bwilliams@uj.ac.za](mailto:bwilliams@uj.ac.za)

| <b>Index</b>                                                                              | <b>Page</b> |
|-------------------------------------------------------------------------------------------|-------------|
| 1. General experimental procedures                                                        | 2           |
| 2. List of known compounds with references;<br>list of new compounds with analytical data | 2           |
| 3. Copies of $^1\text{H}$ and $^{13}\text{C}$ NMR spectra of new compounds                | 11          |

The majority of the acetals used in this study are either commercially available or have been previously described and characterised. The latter are referenced. The few that have not been previously described are provided with analytical details. NMR spectra are also provided.

### General experimental procedure:

The reactions were performed in neat deionised water unless otherwise indicated. No special precautions were taken to exclude oxygen and standard round bottomed flasks were used. To 12.5 mmol of the acetal were added 15 mL of deionised water. The reaction vessel was heated to 80 °C for the determined period of time after which the water was simply removed by evaporation thereof. Alternatively, diethyl ether (3 × 5 mL) could be used with which to extract the organic material from the aqueous layer. The organic phase was dried with anhydrous magnesium sulphate and the volatile component removed under vacuum. In all cases the products were isolated directly in >98% purity as determined by <sup>1</sup>H NMR and GC analyses without further need for purification. The aldehyde or ketone products were compared spectroscopically with their commercially available counterparts.

In instances where the reactions were performed under pressure, stainless steel autoclaves fitted with a PTFE liner, a pressure gauge, filler fitting with a tap valve (needle type) and pressure relief safety device were used (Caution: high pressure reactions should be performed only by suitably trained personnel who understand the risks involved, making use of appropriate pressure vessels). The acetal was weighed directly into the PTFE liner which was then placed inside the pressure vessel. The relevant aqueous solvent mixture as indicated in the main text of this manuscript was added to the acetal and the pressure vessel sealed and pressurised with nitrogen from a high pressure cylinder. The vessels was heated in an oil bath to the temperature and for the time indicated in the main text of this article. At the end of the reaction the pressure vessel was cooled and de-pressurised inside a fume hood. The reaction contents were then treated as usual (see above) to isolate the products.

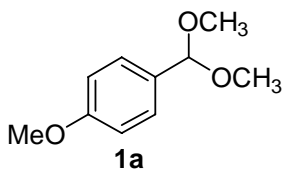

Commercially available

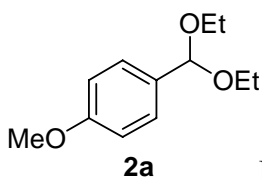

Mansilla, H.; Afonso, M, M. *Synth. Commun.* **2008**, *38*, 2607.

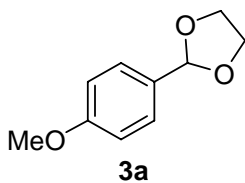

Ren, Y.-M.; Cai, C. *Tetrahedron Let.* **2008**, *49*, 7110.

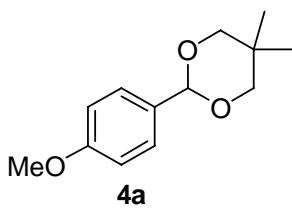

Bandgar, B. P.; Gaikwad, N. B. *Monatsh. Chem.* **1998**, *129*, 719.

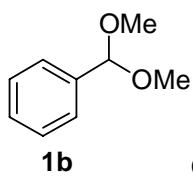

Commercially available

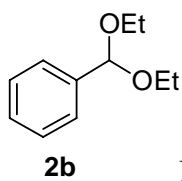

Mansilla, H.; Afonso, M, M. *Synth. Commun.* **2008**, *38*, 2607.

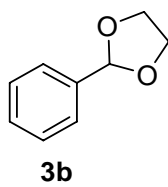

Commercially available

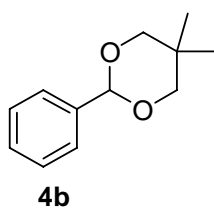

Bandgar, B. P.; Gaikwad, N. B. *Monatsh. Chem.* **1998**, *129*, 719.

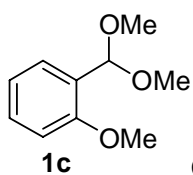

Clerici, A.; Pastori, N.; Porta, O. *Tetrahedron* **1998**, *54*, 15679.

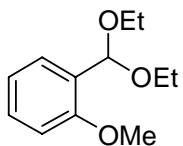

**2c** Baldoli, C.; Maiorana, S.; Licandro, E.; Casiraghi, L.; Zinzalla, G.; Seneci, P.; De Magistris, E.; Paio, A.; Marchioro, C. *J. Comb. Chem.* **2003**, *5*, 809.

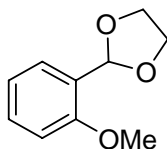

**3c** Moghaddam, F. M.; Sharifi, A. *Synth. Commun.* **1995**, *25*, 2457.

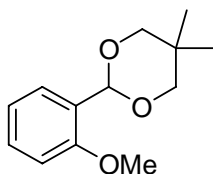

**4c** Prepared according to Williams, D. B. G.; Lawton, M. *Green Chem.* **2008**, *10*, 914; (12.5 mmol scale, 92% yield).  $^1\text{H}$  NMR ( $\text{CDCl}_3$ , 300 MHz): 7.63 (dd, 1H,  $J = 7.7, 1.7$  Hz), 7.21 (ddd, 1H,  $J = 8.1, 7.7, 1.7$  Hz), 6.97 (t, 1H,  $J = 7.7$  Hz), 6.87 (d, 1H,  $J = 8.1$  Hz), 5.77 (s, 1H), 3.82 (s, 3H), 3.74 (d, 2H,  $J = 11.0$  Hz), 3.66 (d, 2H,  $J = 11.0$  Hz), 1.31 (s, 3H), 0.77 (s, 3H);  $^{13}\text{C}$  NMR ( $\text{CDCl}_3$ , 75.5 MHz):  $\delta$  157.6, 130.0, 127.1, 125.7, 120.8, 110.6, 96.8, 77.9, 55.6, 30.3, 23.1, 21.9; IR  $\nu_{\text{max}}$  2948, 2859, 1498, 1394, 1245, 1086, 988  $\text{cm}^{-1}$ ; CI-HRMS  $\text{C}_{13}\text{H}_{14}\text{O}_3$   $[\text{M}]^+$  calcd 222.1256, found 222.1253.

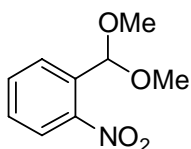

**1d** Akue-Gedu, R.; Gautret, P.; Lelieur, J.-P.; Rigo, B. *Synthesis* **2007**, 3319.

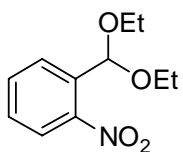

**2d** Gopinath, R.; Haque, Sk. J.; Patel, B. K. *J. Org. Chem.* **2002**, *67*, 5842

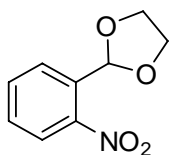

**3d** Banik, B. K.; Chapa, M.; Marquez, J.; Cardona, M. *Tetrahedron Lett.* **2005**, *46*, 2341.

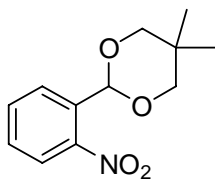

**4d** Bandgar, B. P.; Gaikwad, N. B. *Monatsh. Chem.* **1998**, *129*, 719.

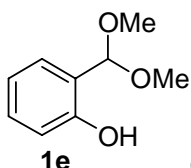

**1e** Clerici, A.; Pastori, N.; Porta, O. *Tetrahedron* **1998**, *54*, 15679.

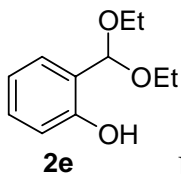

**2e** Du, Y.; Tian, F. *Synth. Commun.* **2005**, *35*, 2703.

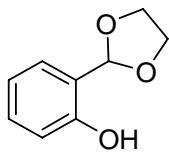

**3e** Ren, Y.-M.; Cai, C. *Tetrahedron Let.* **2008**, *49*, 7110.

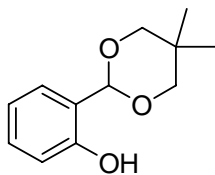

**4e** Prepared according to Williams, D. B. G., Lawton, M. *Green Chem.* **2008**, *10*, 914; (12.5 mmol scale, 96% yield).  $^1\text{H}$  NMR ( $\text{CDCl}_3$ , 300 MHz): 7.99 (s, 1H), 7.22 (t, 1H,  $J = 7.8$  Hz), 7.16 (dd, 1H,  $J = 7.8, 1.5$  Hz), 6.88 (d, 1H,  $J = 7.8$  Hz), 6.85 (td, 1H,  $J = 7.8, 1.5$  Hz), 5.53 (s, 1H), 3.81 (d, 2H,  $J = 11.3$  Hz), 3.66 (d, 2H,  $J = 11.3$  Hz), 1.28 (s, 3H), .081 (s, 3H);  $^{13}\text{C}$  NMR ( $\text{CDCl}_3$ , 75 MHz):  $\delta$  155.3, 130.4, 128.0, 121.7,

119.7, 117.2, 103.2, 77.6, 30.3, 23.0, 21.8; IR ( $\nu_{max}$   $\text{cm}^{-1}$ ) 3335, 2958, 2872, 1491, 1476, 1384, 1242, 1086; CI-HRMS  $\text{C}_{15}\text{H}_{29}\text{O}_2$   $[\text{M}-\text{H}]^+$  calcd 241.2162, found 241.2166.

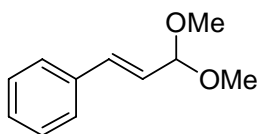

**1f**

Clerici, A.; Pastori, N.; Porta, O. *Tetrahedron* **1998**, *54*, 15679.

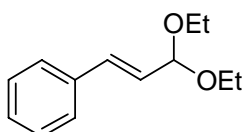

**2f**

Mansilla, H.; Afonso, M. M. *Synth. Commun.* **2008**, *38*, 2607.

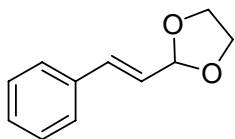

**3f**

Moghaddam, F. M.; Sharifi, A. *Synth. Commun.* **1995**, *25*, 2457.

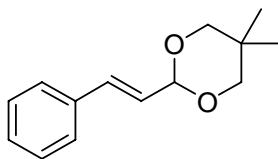

**4f**

Bandgar, B. P.; Gaikwad, N. B. *Monatsh. Chem.* **1998**, *129*, 719.

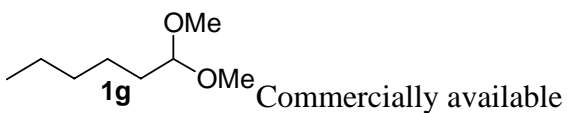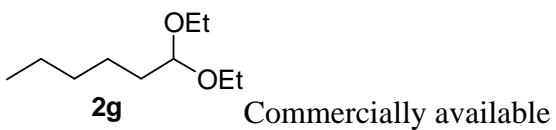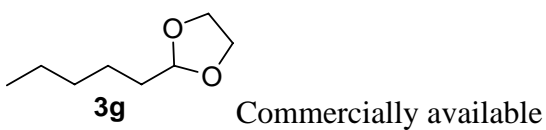

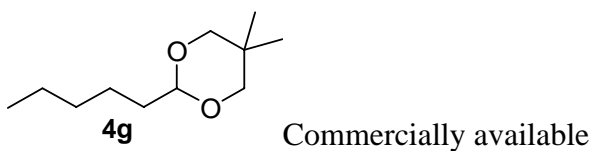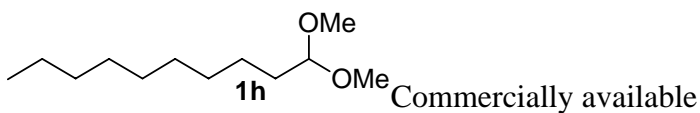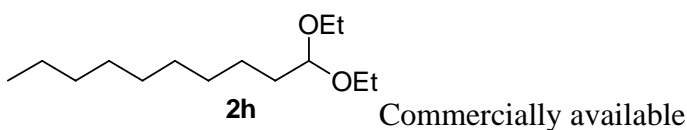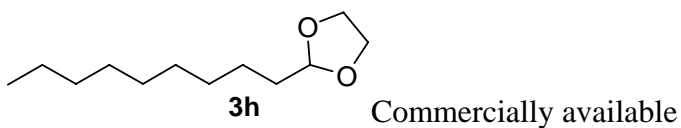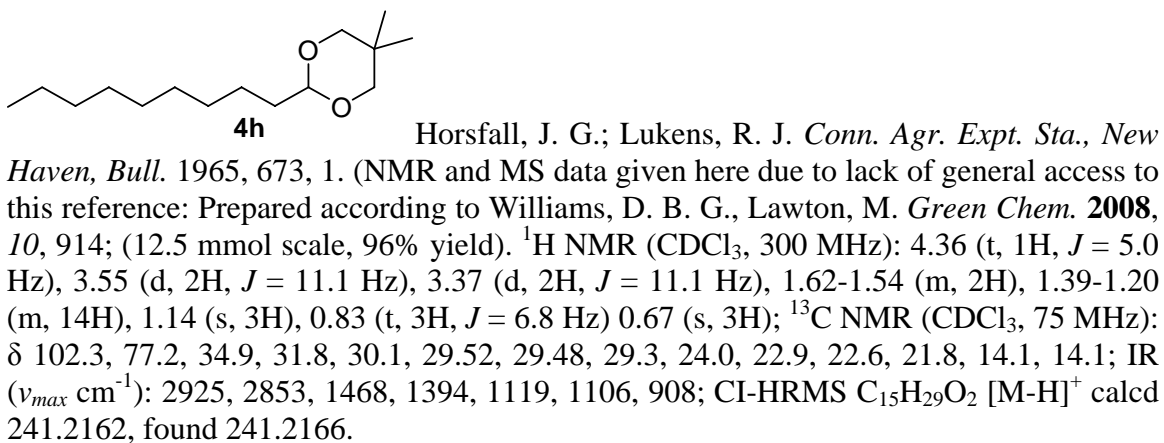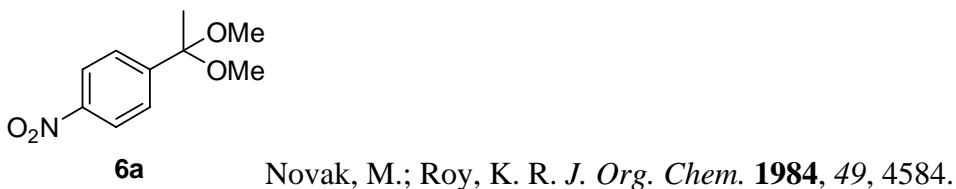

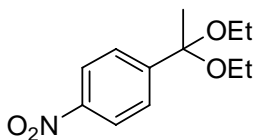

**7a**

Ma, Y.-R.; Jin, T.-S.; Shi, S.-X.; Li, T.-S. *Synth. Commun.* **2003**, *33*,

2103.

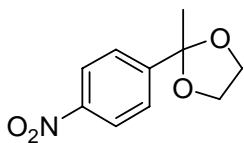

**8a**

Commercially available

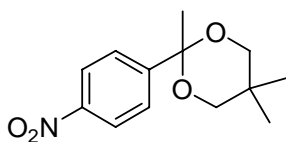

**9a**

Prepared according to Williams, D.B.G., Lawton, M. *Green Chem.* **2008**, *10*, 914; (12.5 mmol scale, 89% yield). <sup>1</sup>H NMR (CDCl<sub>3</sub>, 300 MHz): δ 8.21 (d, 2H, *J* = 8.9 Hz), 7.58 (d, 2H, *J* = 8.9 Hz), 3.41 (d, 2H, *J* = 11.0 Hz), 3.29 (d, 2H, *J* = 11.0 Hz), 1.50 (s, 3H), 1.23 (3, 3H), .058 (s, 3H); <sup>13</sup>C NMR (CDCl<sub>3</sub>, 75.5 MHz): δ 148.9, 147.5, 127.7, 123.8, 99.5, 71.7, 31.4, 29.8, 22.6, 21.6; IR (*v*<sub>max</sub> cm<sup>-1</sup>): 2948, 2872, 1512, 1349, 1182, 1076; CI-HRMS C<sub>13</sub>H<sub>18</sub>O<sub>4</sub>N [M+H]<sup>+</sup> calcd 252.1236 found 252.1239.

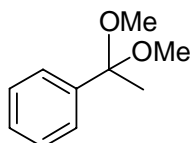

**6b**

Commercially available

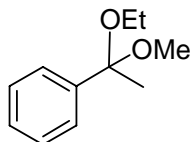

**7b**

Mansilla, H.; Afonso, M. M. *Synth. Commun.* **2008**, *38*, 2607.

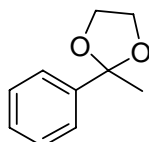

**8b**

Ren, Y.-M.; Cai, C. *Tetrahedron Let.* **2008**, *49*, 7110.



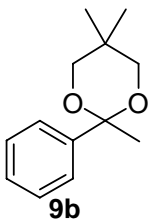

Bandgar, B. P.; Gaikwad, N. B. *Monatsh. Chem.* **1998**, *129*, 719.

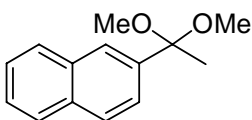

Kerti, G.; Kurtan, T.; Borbas, A.; Szabo, Z. B.; Liptak, A.; Szilagyi, L.; Illyes-Tuende, Z.; Benyei, A.; Antus, S.; Watanabe, M.; Castiglioni, E.; Pescitelli, G.; Salvadori, P. *Tetrahedron.* **2008**, *64*, 1676.

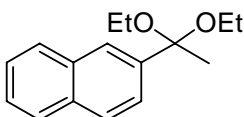

Prepared from 2-acetonaphthone (2.128 g, 12.5 mmol scale) according to Williams, D.B.G.; Lawton, M. *Green Chem.* **2008**, *10*, 914 (2.718 g, 11.1 mmol, 89% yield).  $^1\text{H}$  NMR ( $\text{CDCl}_3$ , 300 MHz):  $\delta$  8.03 (br s, 1H), 7.89-7.79 (m, 2H), 7.81 (d, 1H,  $J = 8.7$  Hz), 7.60 (dd, 1H,  $J = 7.8, 1.8$  Hz), 7.49-7.42 (m, 2H), 3.59-3.48 (m, 2H), 3.45-3.35 (m, 2H), 1.63 (s, 3H), 1.24 (t, 6H,  $J = 6.9$  Hz);  $^{13}\text{C}$  NMR ( $\text{CDCl}_3$ , 75.5 MHz):  $\delta$  141.3, 133.1, 132.7, 128.4, 127.7, 127.5, 125.8 (2C), 125.2, 124.3, 101.3, 56.8, 27.0, 15.4, 15.2; IR ( $\nu_{\text{max}}$   $\text{cm}^{-1}$ ): 2976, 1371, 1277, 1132, 1048, 906; CI-HRMS  $\text{C}_{14}\text{H}_{15}\text{O}$   $[\text{M}-\text{C}_2\text{H}_5\text{O}]^+$  calcd 199.1123, found 199.1127.

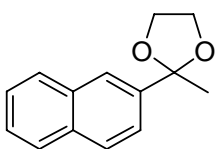

Hyder, Z.; Ruan, J.; Xiao, J. *Chem. Eur. J.* **2008**, *14*, 5555.

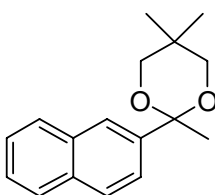

Grosu, I.; Ple, G.; Mager, S.; Mesaros, E.; Dulau, A.; Gego, C. *Tetrahedron* **1998**, *54*, 2905.

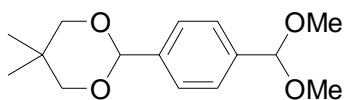

**11**

Nao, H.; Kiyoshi, K.; Hisashi, S.; Tsuneko, S. *Synlett* **2004**, *6*, 1074.

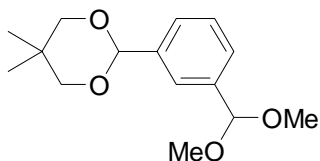

**13**

Prepared according to Nao, H.; Kiyoshi, K.; Hisashi, S.; Tsuneko, S. *Synlett* **2004**, *6*, 1074, as for the synthesis of **11**.  $^1\text{H}$  NMR ( $\text{CDCl}_3$ , 300 MHz): 7.61 (s, 1H), 7.49 (d,  $J = 7.5$  Hz, 2H), 7.36 (t,  $J = 7.5$  Hz, 1H), 5.38 (s, 2H), 3.75 (d,  $J = 10.8$  Hz, 2H), 3.61 (d,  $J = 10.8$  Hz, 2H), 3.31 (s, 3H), 3.29 (s, 3H), 1.26 (s, 3H), 0.77 (s, 3H);  $^{13}\text{C}$  NMR ( $\text{CDCl}_3$ , 75.5 MHz):  $\delta$  138.5, 128.1, 127.1, 126.7, 126.2, 125.1, 102.7, 101.6, 77.6, 52.7, 52.5, 30.2, 23.0, 21.8; IR  $\nu_{\text{max}}$  2954, 2831, 1450, 1349, 1159, 1101, 1052  $\text{cm}^{-1}$ ; CI-HRMS  $\text{C}_{15}\text{H}_{23}\text{O}_4$   $[\text{M}+\text{H}]^+$  calcd 267.1596, found 267.1592.

Pulse Sequence: s2pu1  
Solvent: CDCl3  
Ambient temperature  
File: 1  
GEMINI-300BB "kmr300"

Relax. delay 1.000 sec  
Pulse 88.7 degrees  
Acq. time 2.000 sec  
Width 4800.0 Hz  
Single scan  
OBSERVE H1, 300.0575472 MHZ  
DATA PROCESSING  
FT size 32768  
Total time 0 min, 4 sec

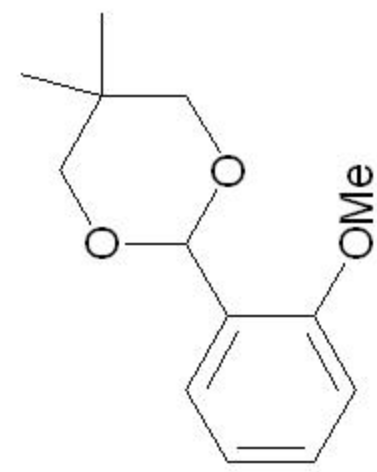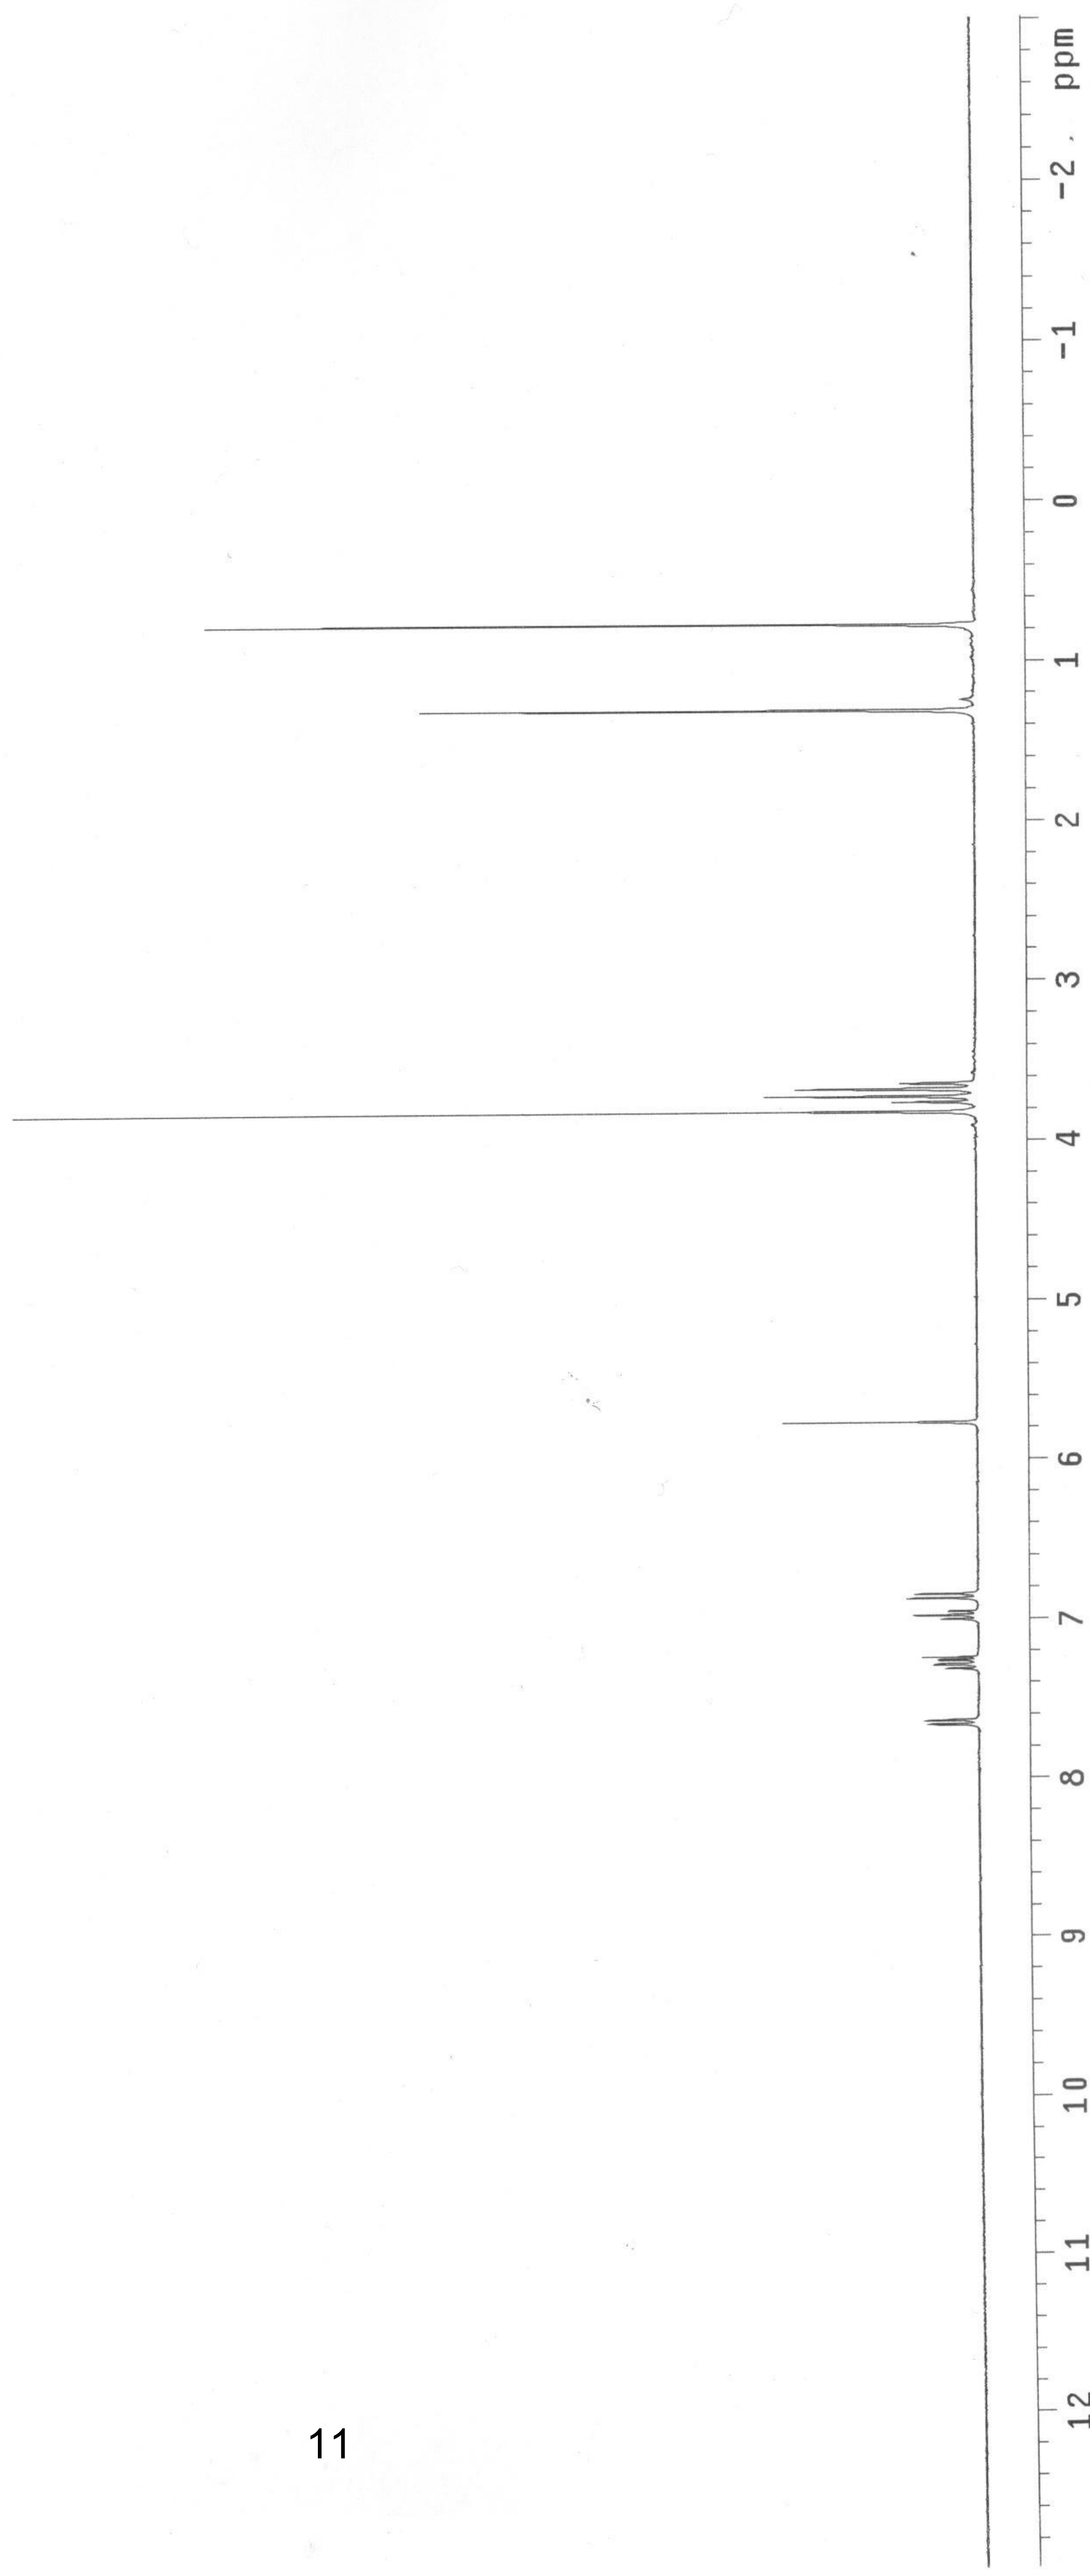

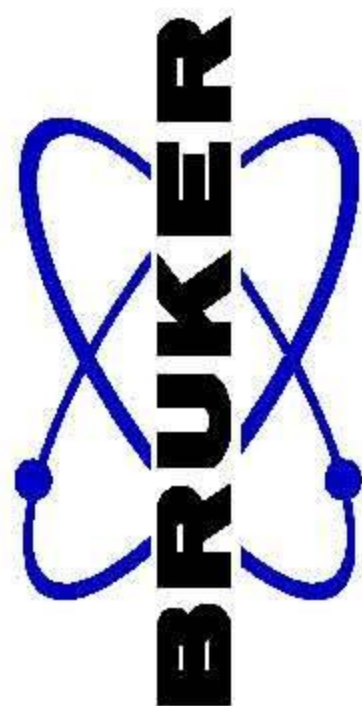

NAME A28  
EXPNO 1  
PROCNO 1  
Date\_ 20100831  
Time\_ 10.42  
INSTRUM spect  
PROBHD 5 mm PABBO BB-  
PULPROG zgpg30  
TD 65536  
SOLVENT CDCl3  
NS 128  
DS 4  
SWH 24038.461 Hz  
FIDRES 0.366798 Hz  
AQ 1.3631988 sec  
RG 128  
DW 20.800 usec  
DE 6.50 usec  
TE 296.2 K  
D1 2.0000000 sec  
D11 0.0300000 sec  
TD0 1

==== CHANNEL f1 =====  
NUC1 13C  
P1 9.60 usec  
PL1 -1.50 dB  
PL1W 51.80275345 W  
SFO1 100.6328888 MHz

==== CHANNEL f2 =====  
CPDPRG2 waltz16  
NUC2 1H  
PCPD2 90.00 usec  
PL2 -3.00 dB  
PL12 15.30 dB  
PL2W 23.05461311 W  
PL12W 0.34100270 W  
SFO2 400.1716007 MHz  
SI 32768  
SF 100.6228393 MHz  
WDW EM  
SSB 0  
LB 1.00 Hz  
GB 0  
PC 1.40

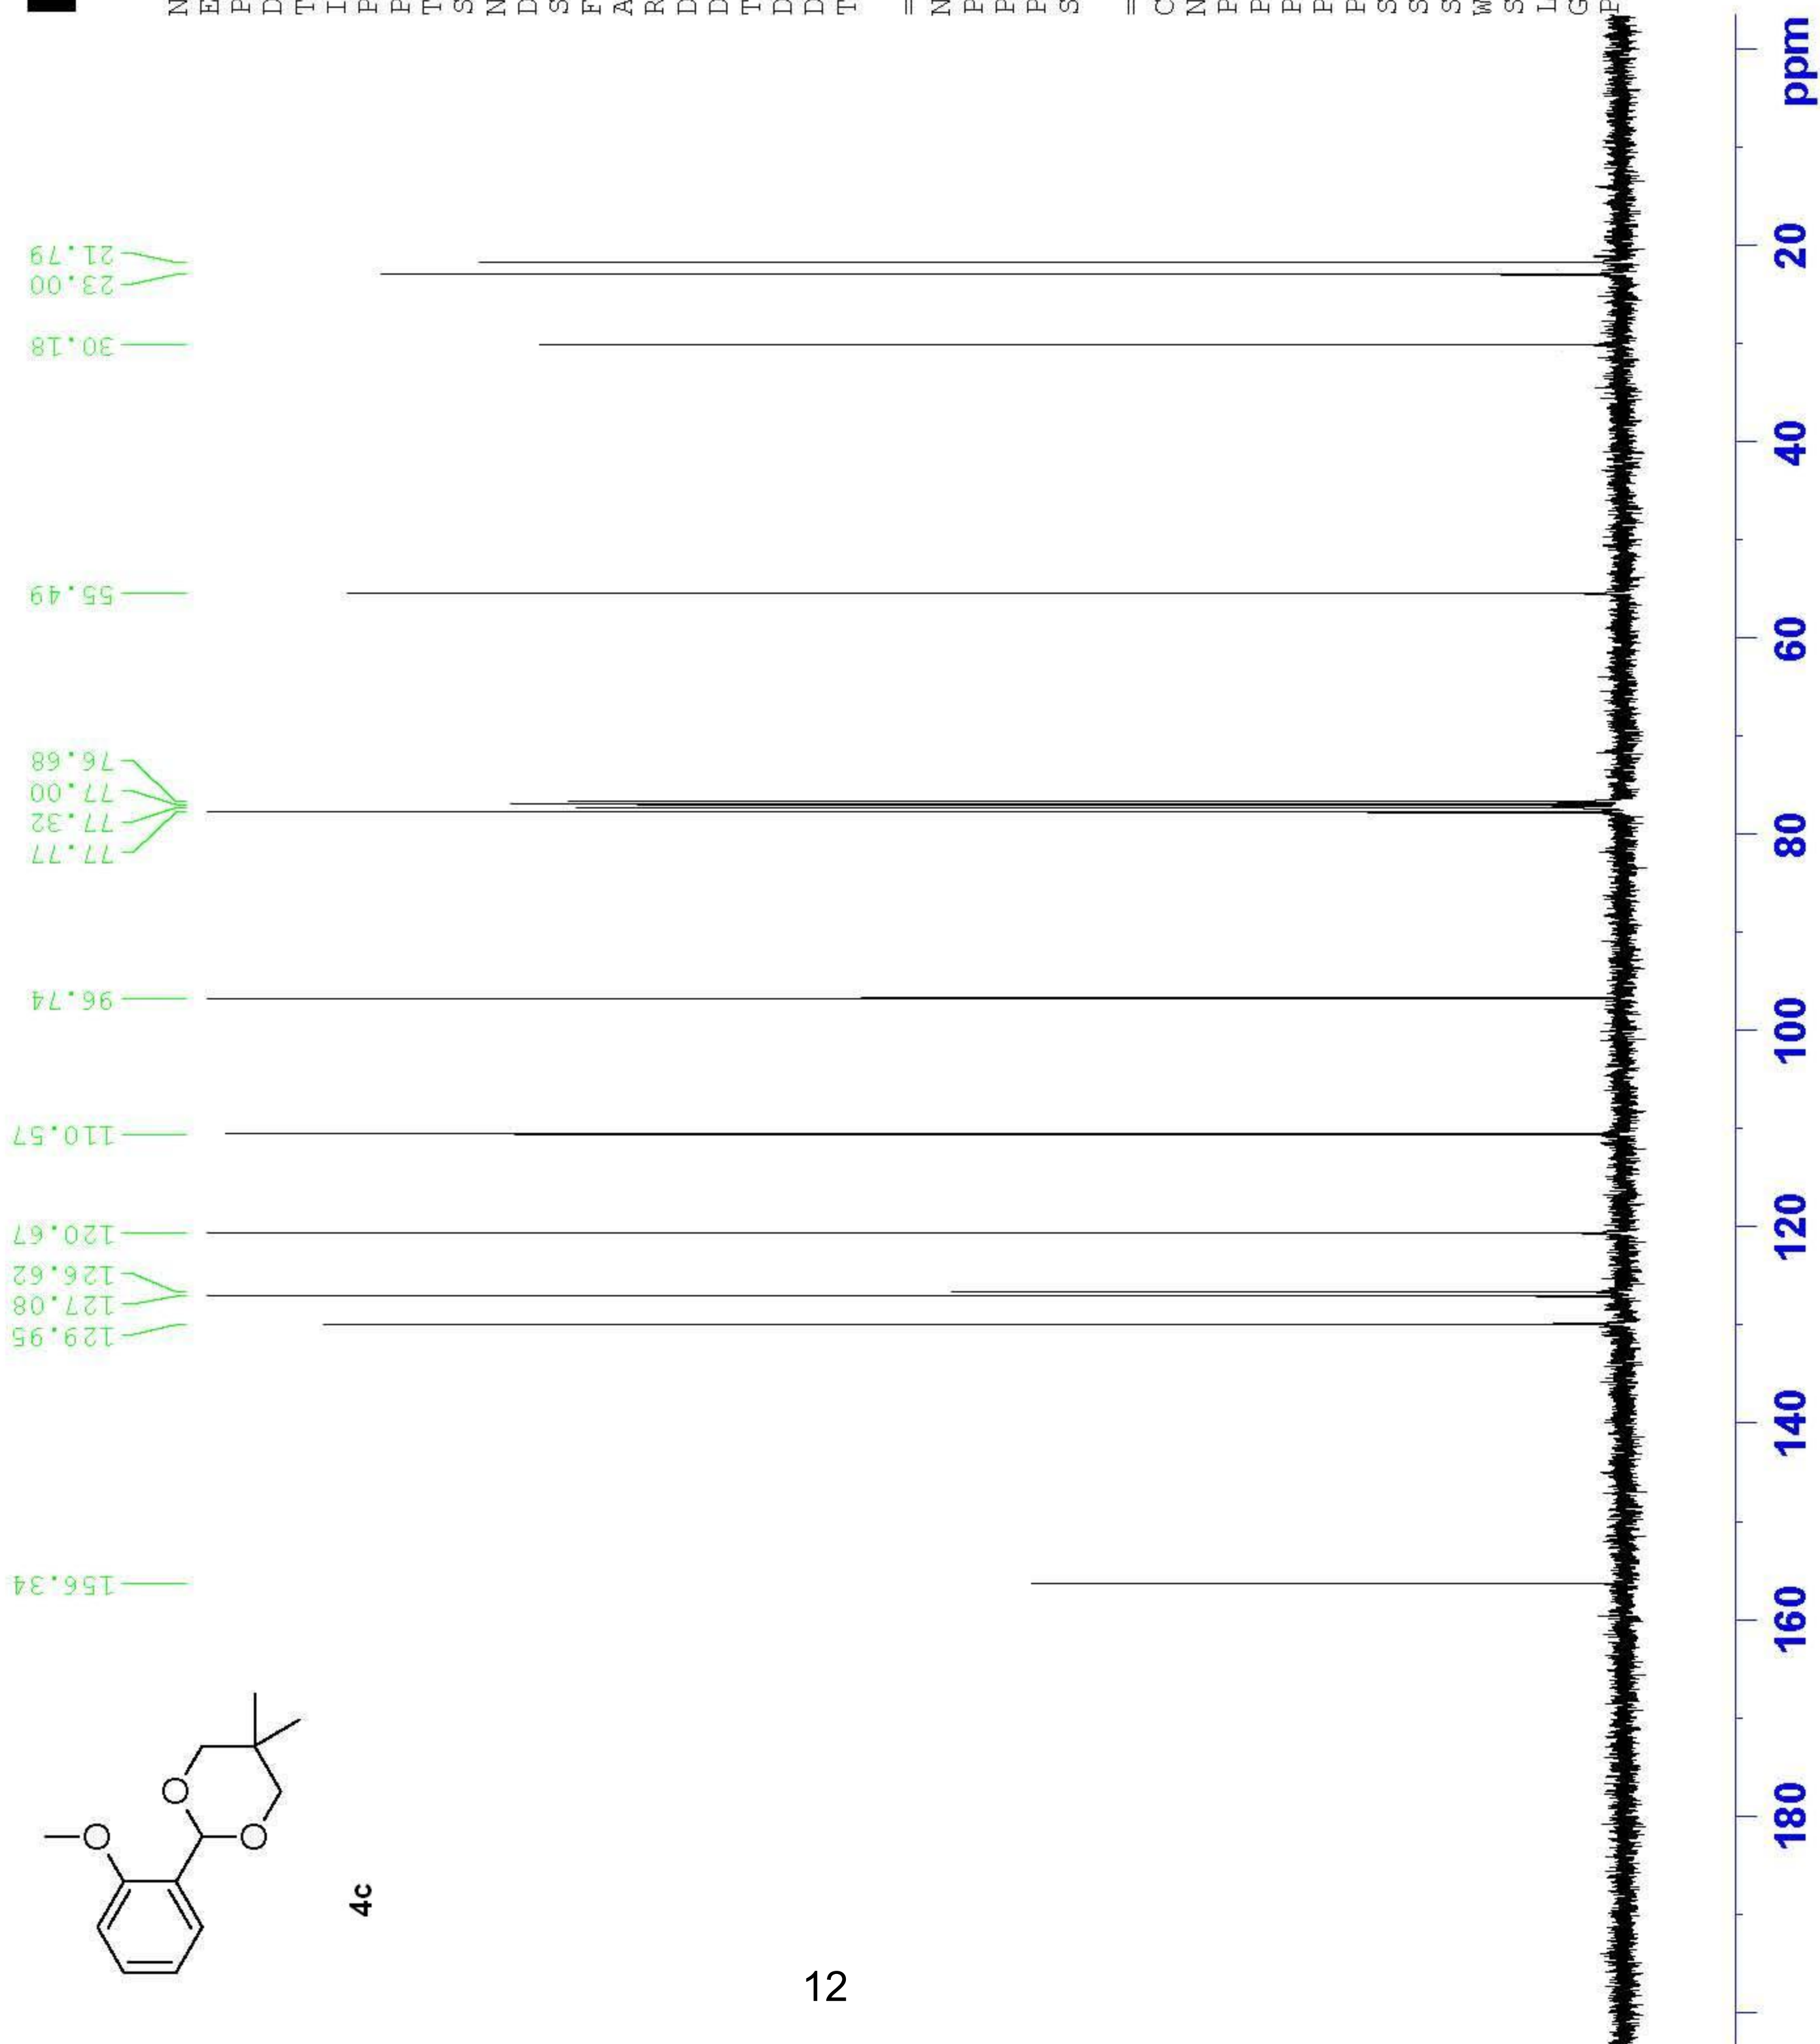

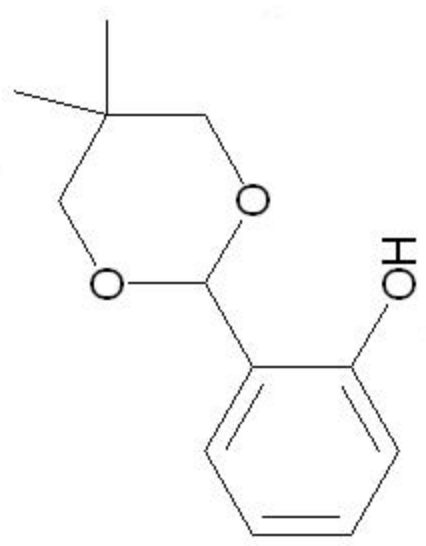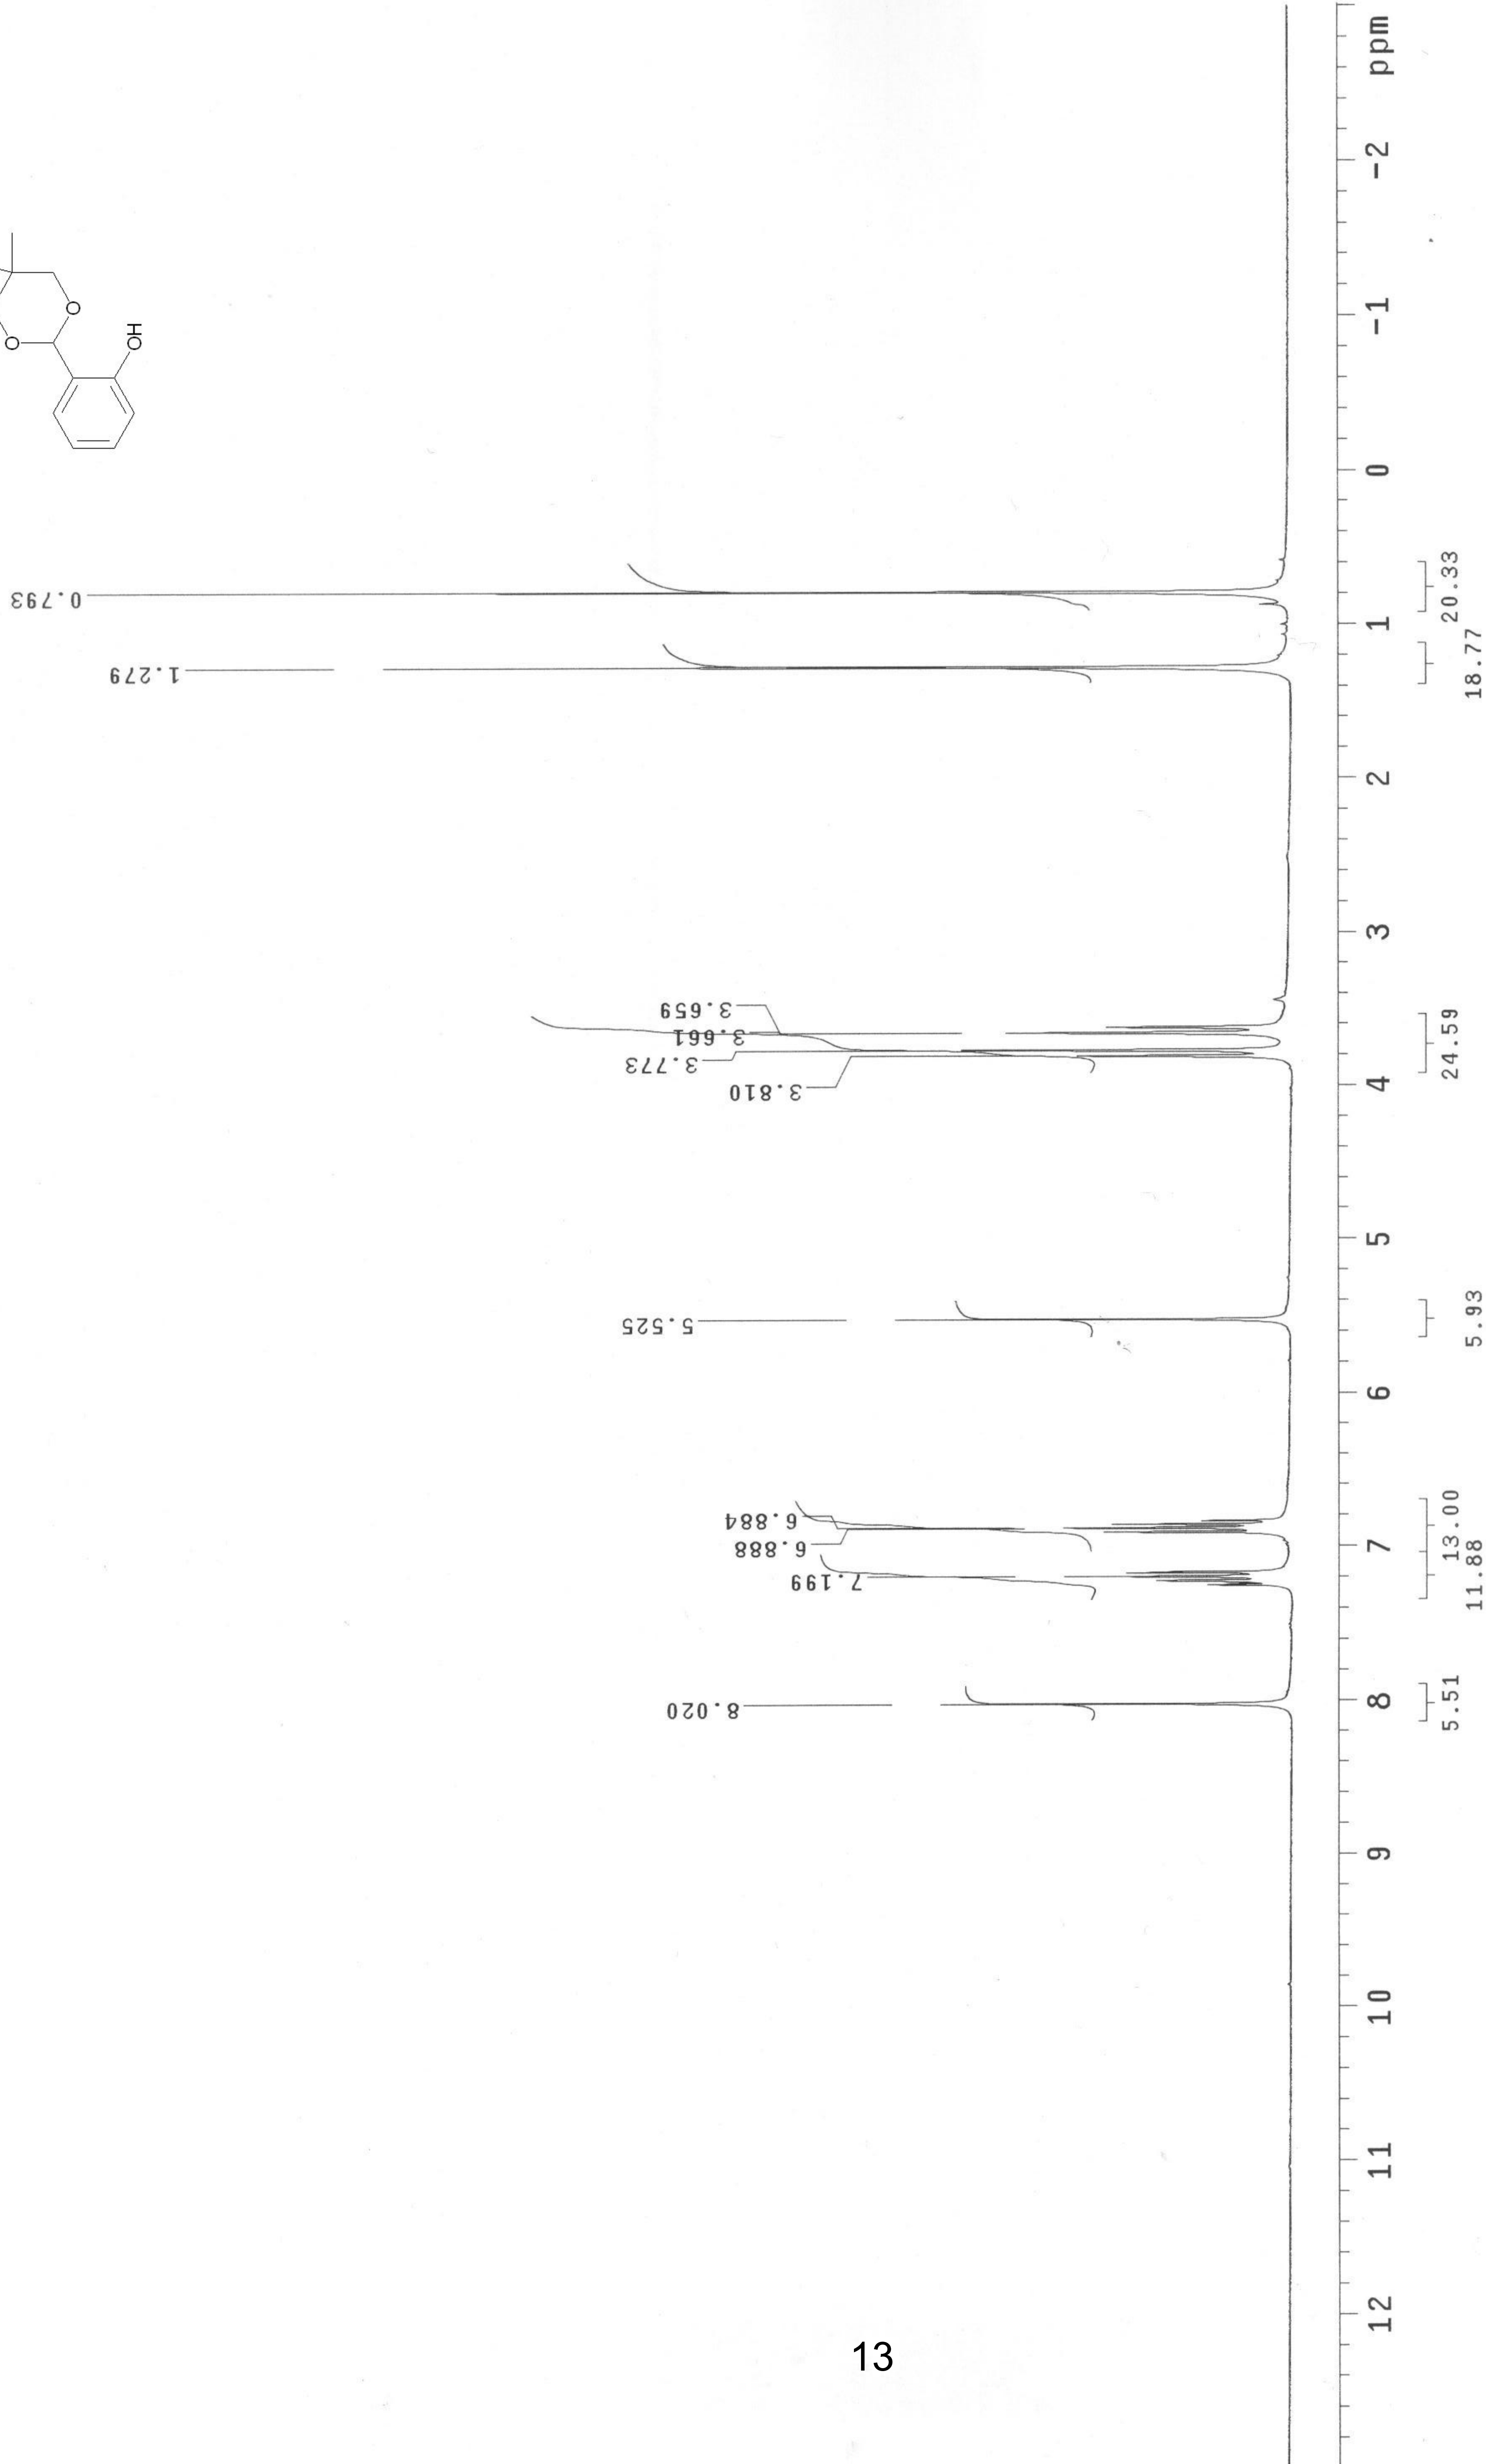

| PULSE SEQUENCE                                                                                          | OBSERVE         | DATA PROCESSING                      | STANDARD 1H OBSERVE                                                                   |
|---------------------------------------------------------------------------------------------------------|-----------------|--------------------------------------|---------------------------------------------------------------------------------------|
| Relax. delay 1.000 sec<br>Pulse 6.3 degrees<br>Acq. time 2.000 sec<br>Width 4800.0 Hz<br>12 repetitions | H1, 300.0575460 | FT size 32768<br>Total time 1 minute | Pulse Sequence: s2pu1<br>Solvent: CDCl3<br>Ambient temperature<br>GEMINI-300 "Kmr300" |



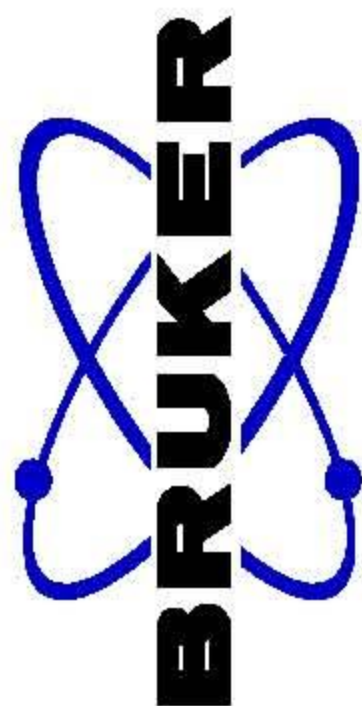

NAME A30-1H  
EXPNO 3  
PROCNO 1  
Date\_ 20100831  
Time\_ 9.57  
INSTRUM spect  
PROBHD 5 mm PABBO BB-  
PULPROG zgpg30  
TD 65536  
SOLVENT CDCl3  
NS 128  
DS 4  
SWH 24038.461 Hz  
FIDRES 0.366798 Hz  
AQ 1.3631988 sec  
RG 101  
DW 20.800 usec  
DE 6.50 usec  
TE 296.0 K  
D1 2.0000000 sec  
D11 0.0300000 sec  
TD0 1

==== CHANNEL f1 =====  
NUC1 13C  
P1 9.60 usec  
PL1 -1.50 dB  
PL1W 51.80275345 W  
SFO1 100.6328888 MHz

==== CHANNEL f2 =====  
CPDPRG2 waltz16  
NUC2 1H  
PCPD2 90.00 usec  
PL2 -3.00 dB  
PL12 15.30 dB  
PL2W 23.05461311 W  
PL12W 0.34100270 W  
SFO2 400.1716007 MHz  
SI 32768  
SF 100.6228422 MHz  
WDW EM  
SSB 0  
LB 1.00 Hz  
GB 0  
PC 1.40

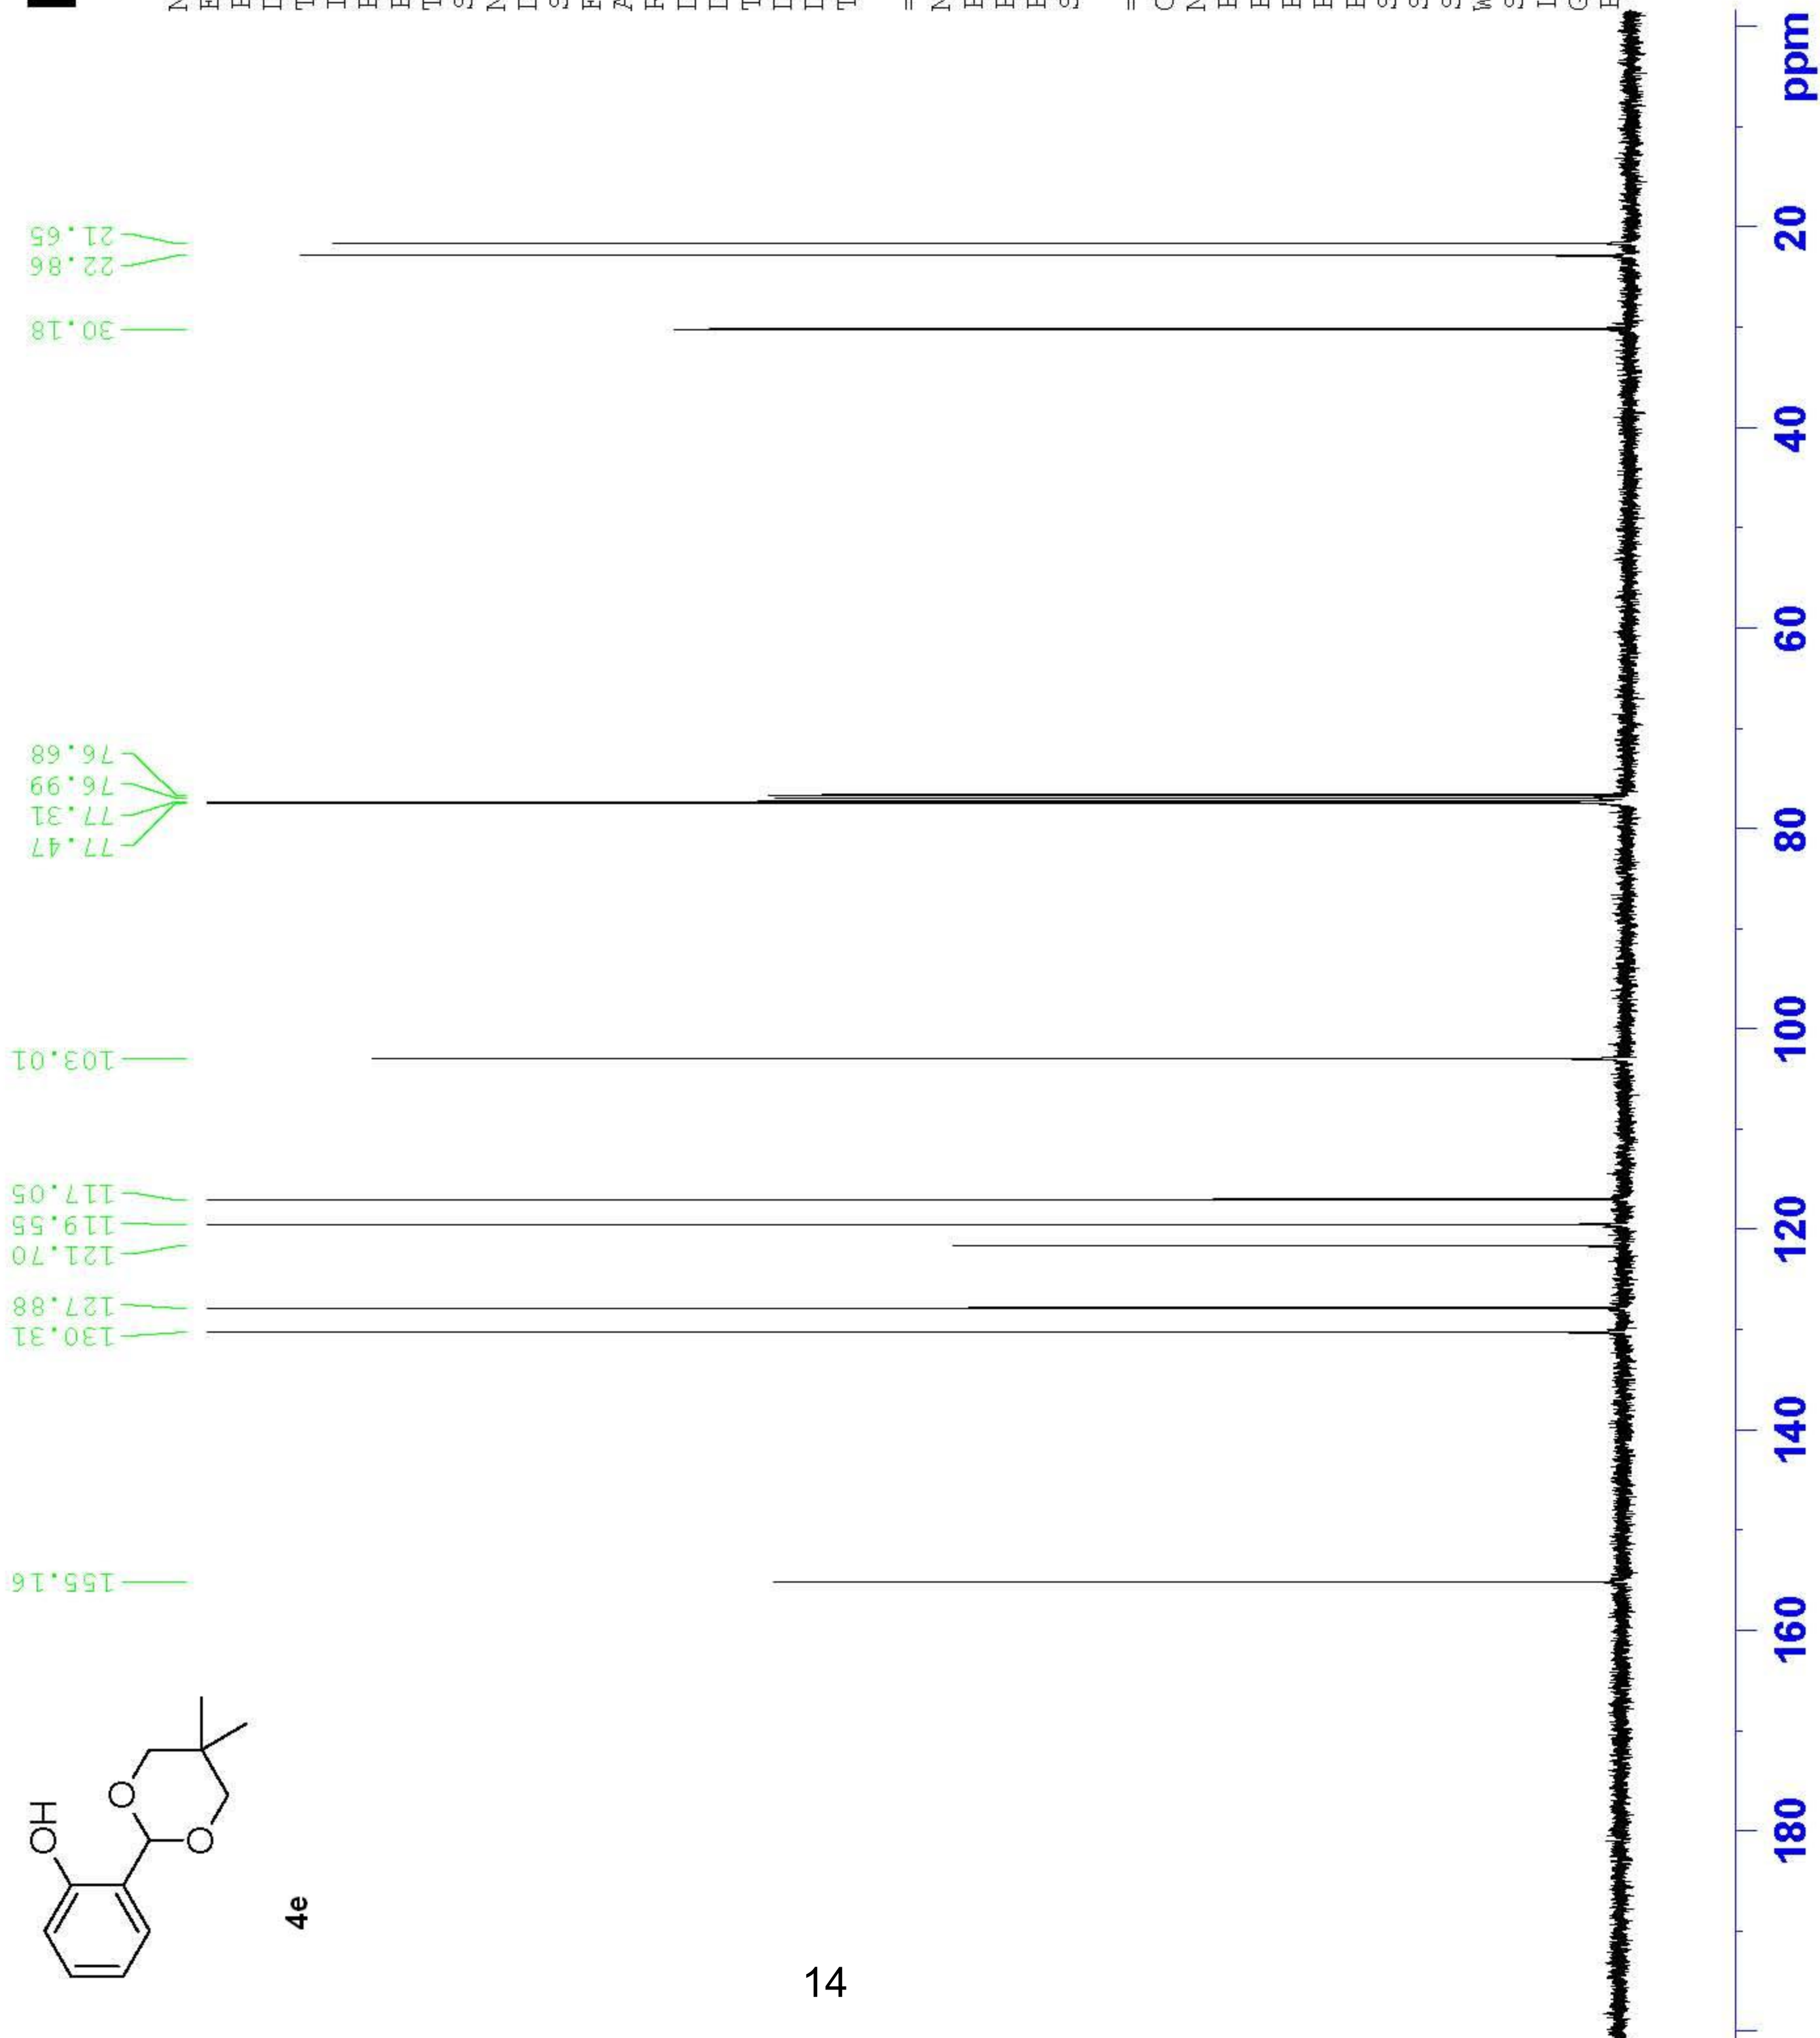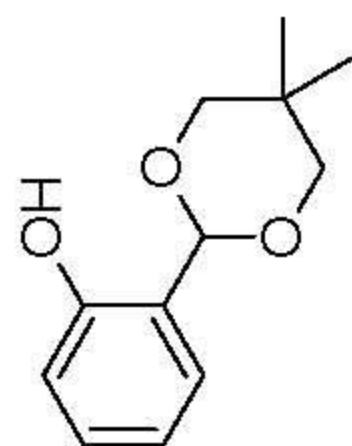

4e

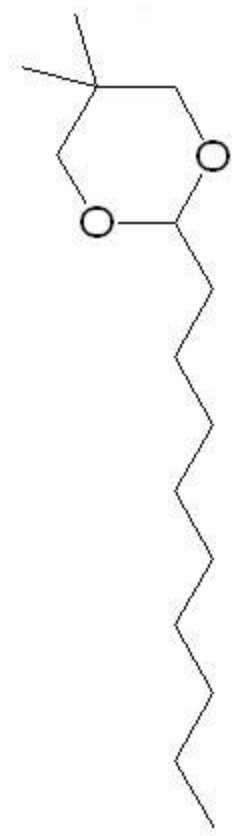

1.580  
1.563  
1.389  
1.368  
1.231  
1.161  
0.868  
0.846  
0.823  
0.687

1.630  
1.611  
1.593

3.590  
3.553  
3.408  
3.407  
3.371

4.391  
4.374  
4.358

7.240

8 7 6 5 4 3 2 1 -0 -1 ppm

17.29

59.77

9.34  
9.28

4.33

|                                                                                                                                       |                                |                                                                  |                                                                                                                         |
|---------------------------------------------------------------------------------------------------------------------------------------|--------------------------------|------------------------------------------------------------------|-------------------------------------------------------------------------------------------------------------------------|
| <p>PULSE SEQUENCE<br/>Relax. delay 1.000 sec<br/>Pulse 6.3 degrees<br/>Acq. time 2.000 sec<br/>Width 4800.0 Hz<br/>12 repetitions</p> | <p>OBSERVE H1, 300.0575463</p> | <p>DATA PROCESSING<br/>FT size 32768<br/>Total time 1 minute</p> | <p>STANDARD 1H OBSERVE<br/>Pulse Sequence: s2pu1<br/>Solvent: CDCl3<br/>Ambient temperature<br/>GEMINI-300 "kmr300"</p> |
|---------------------------------------------------------------------------------------------------------------------------------------|--------------------------------|------------------------------------------------------------------|-------------------------------------------------------------------------------------------------------------------------|

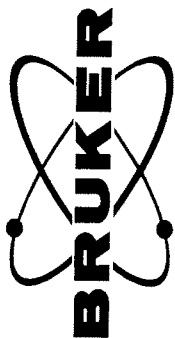

Aug31-2010-HH-10-cycli-acetal

NAME  
EXPNO 1  
PROCNO 1  
Date\_ 20100831  
Time 8.53  
INSTRUM spect  
PROBHD 5 mm PABBO BB-  
PULPROG zgpg30  
TD 65536  
SOLVENT CDCl3  
NS 150  
DS 4  
SWH 24038.461 Hz  
FIDRES 0.366798 Hz  
AQ 1.3631988 sec  
RG 101  
DW 20.800 usec  
DE 6.50 usec  
TE 295.8 K  
D1 2.00000000 sec  
D11 0.03000000 sec  
TD0 1

==== CHANNEL f1 =====  
NUC1 13C  
P1 9.60 usec  
PL1 -1.50 dB  
PL1W 51.80275345 W  
SFO1 100.6328888 MHz  
  
==== CHANNEL f2 =====  
CPDPRG2 waltz16  
NUC2 1H  
PCPD2 90.00 usec  
PL2 -3.00 dB  
PL2W 15.30 dB  
PL12W 23.05461311 W  
SFO2 400.1716007 MHz  
SI 32768  
SF 100.6228293 MHz  
EM 0  
WDW 0  
SSB 0  
LB 1.00 Hz  
GB 0  
PC 1.40

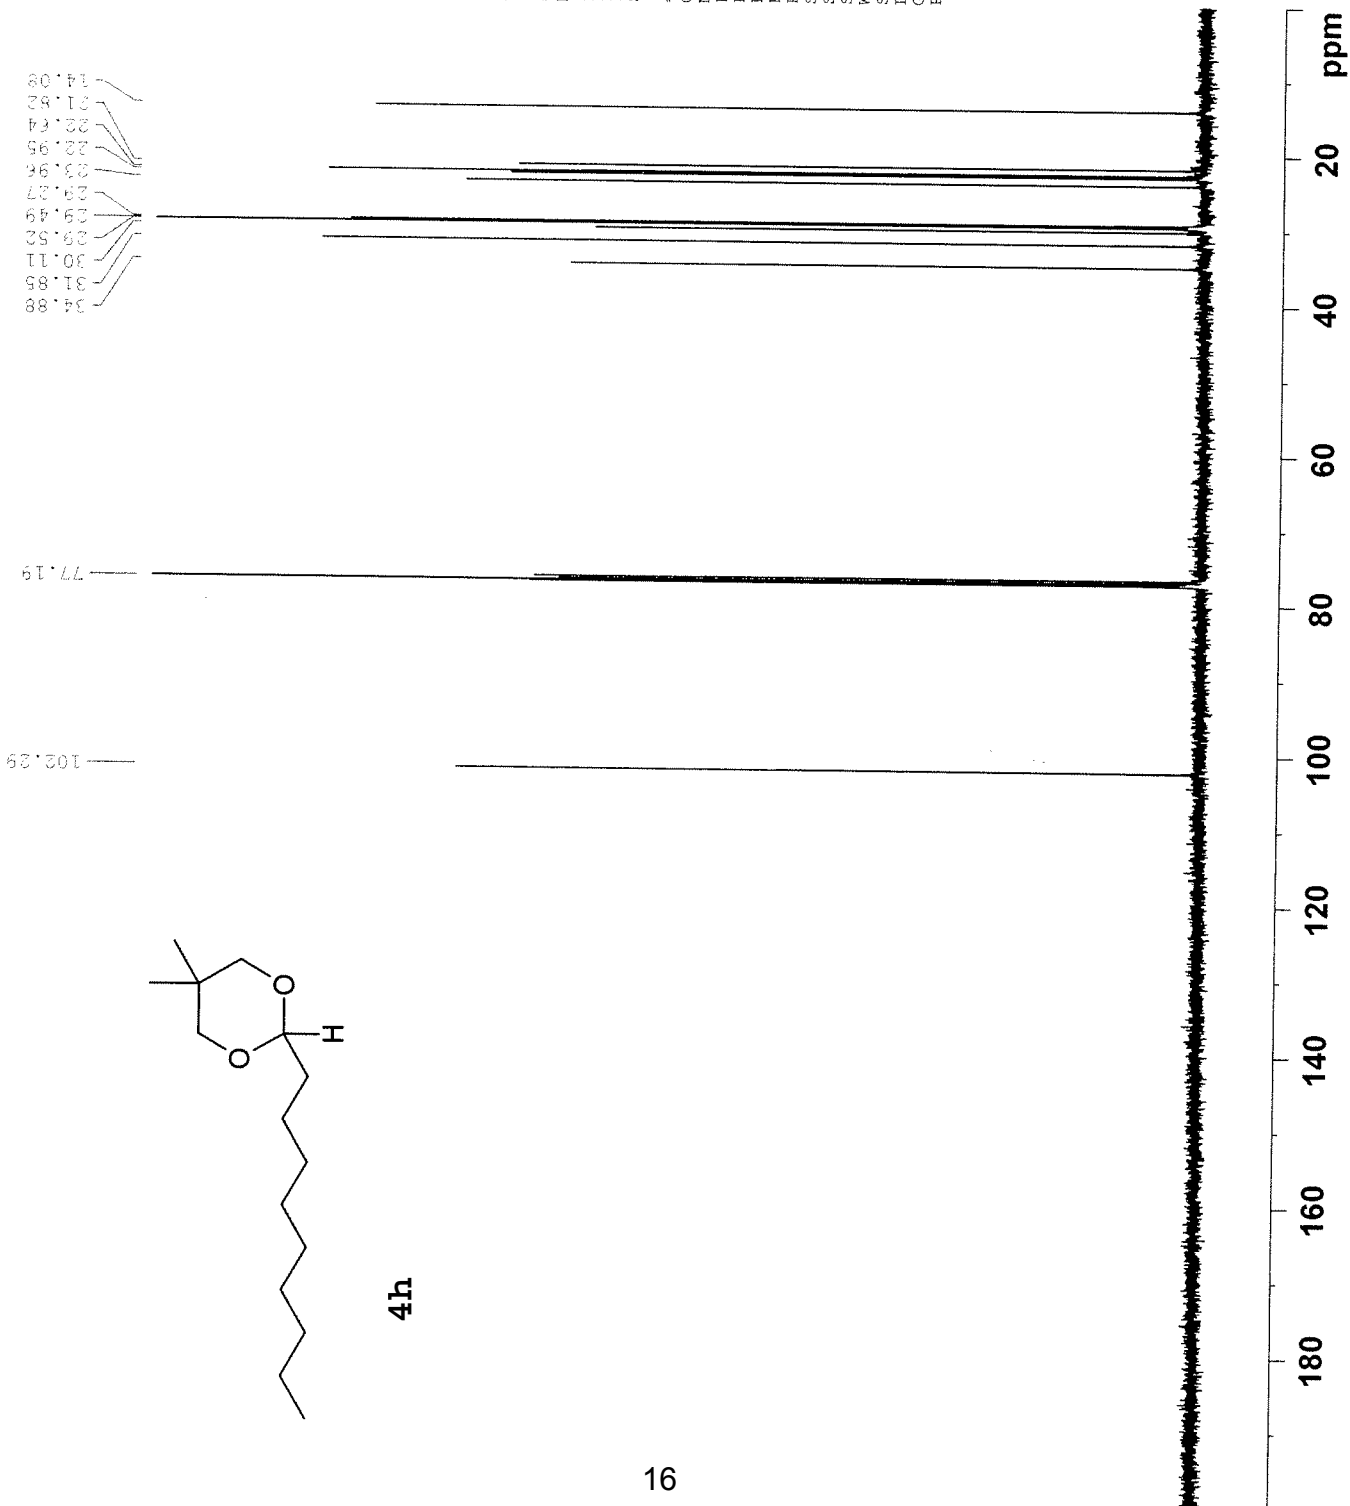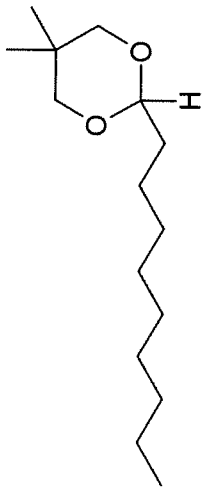



STANDARD 1H OBSERVE

Pulse Sequence: s2pu1

Solvent: -GDC13  
Ambient temperature  
File: honours-paranitrocyclicceta1  
GEMINI-300BB "kmar300"

Relax. delay 1.000 sec  
Pulse 126.0 degrees  
Acq. time 2.000 sec  
Width 4800.0 Hz  
60 repetitions  
OBSERVE H1 300.0575455 MHZ  
DATA PROCESSING  
FT size 32768  
Total time 9 hr, 22 min, 46 sec

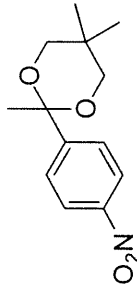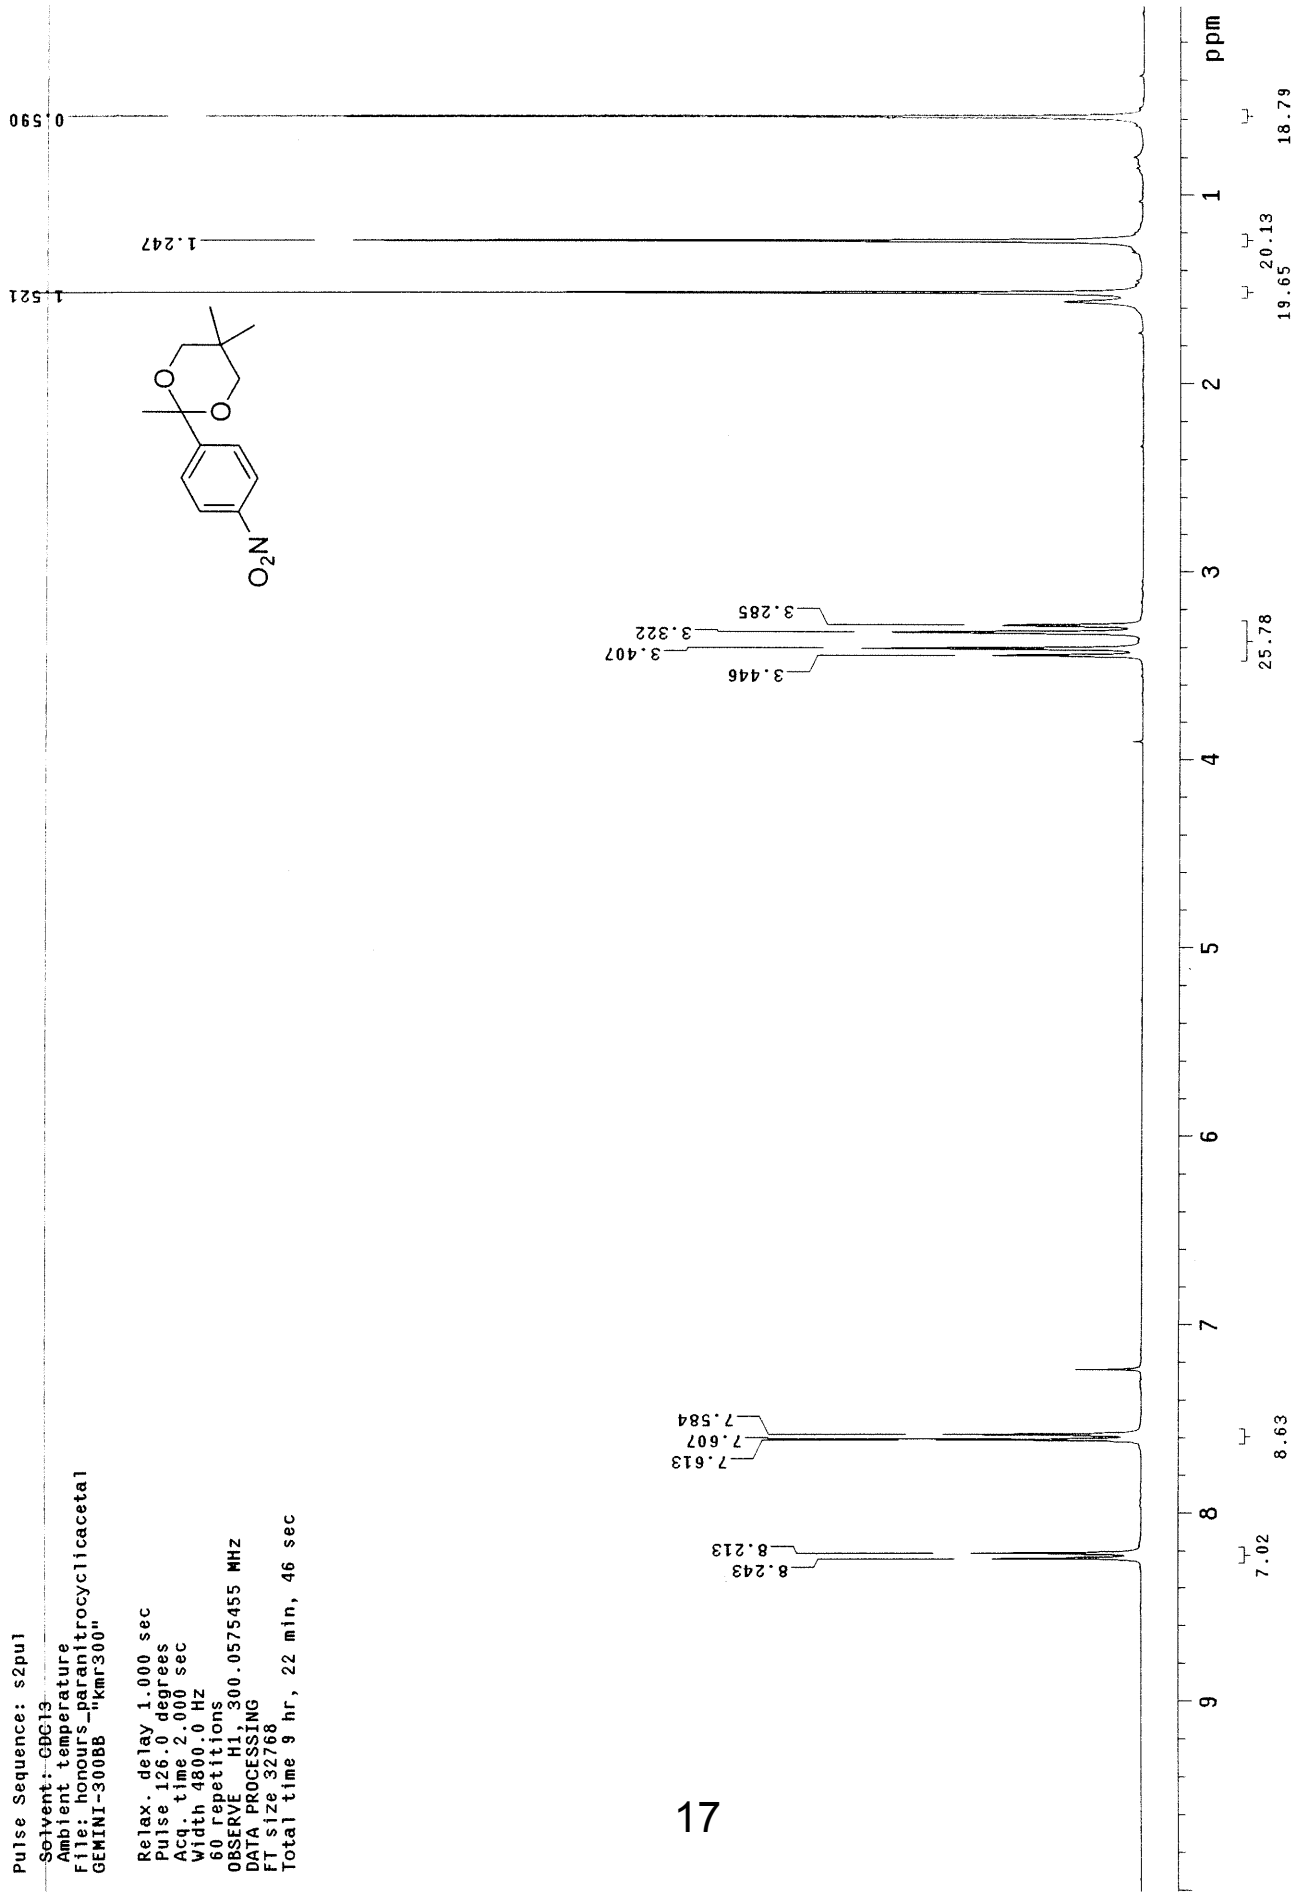

Pulse Sequence: s2pul  
 Solvent: CDCl3  
 Ambient temperature  
 File: p-nitrobenz-propanediol\_13C  
 GEMINI-300BB "kmf300"  
 Pulse 42.3 degrees  
 Acq. time 1.815 sec  
 Width 18761.7 Hz  
 256 repetitions  
 OBSERVE C13, 75.4495295 MHZ  
 DECOUPLE H1, 300.0590418 MHZ  
 Power 37 dB  
 continuously on  
 WALTZ-16 modulated  
 DATA PROCESSING  
 Line broadening 1.0 Hz  
 FT size 131072  
 Total time 16 min, 58 sec

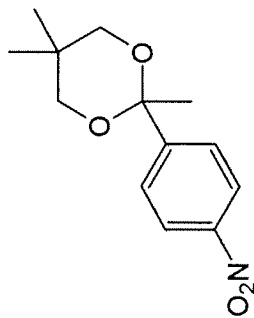

9a

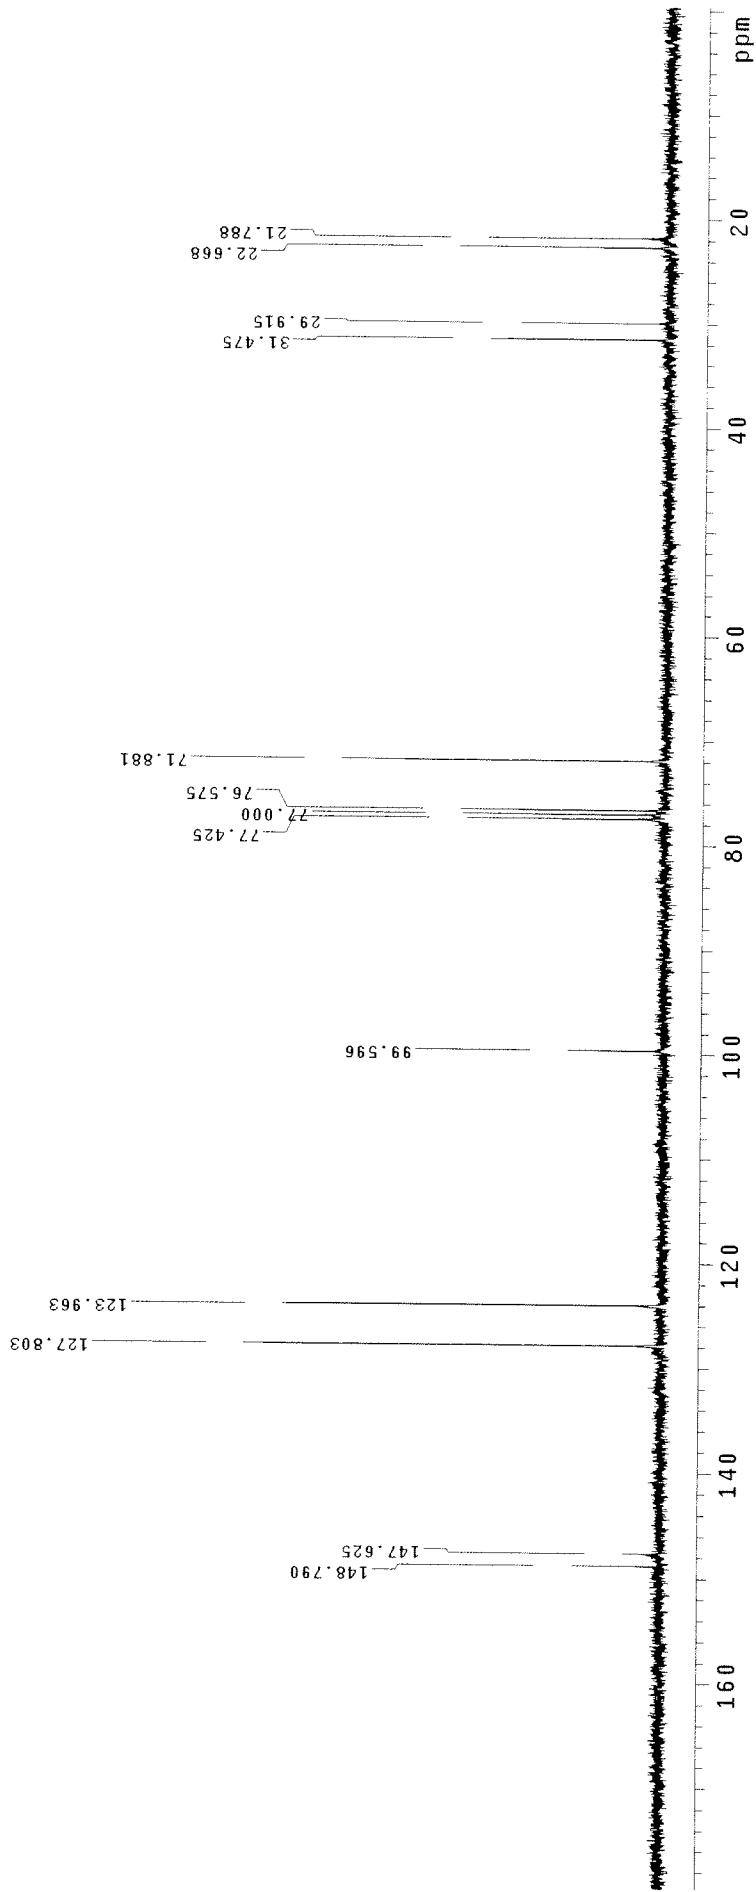

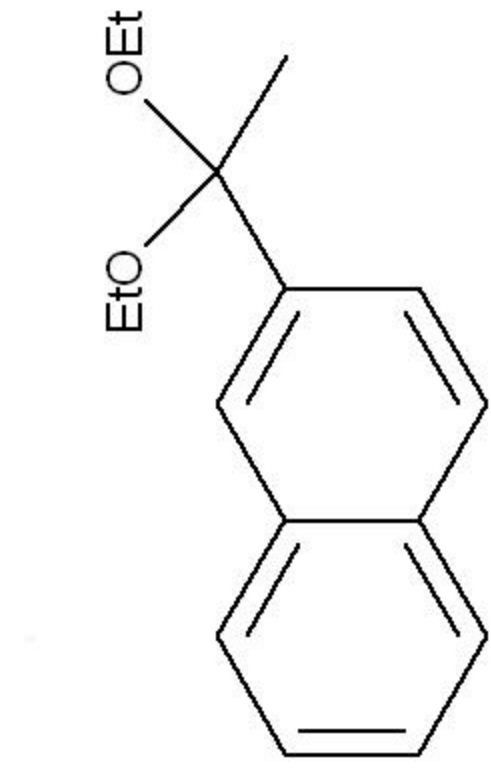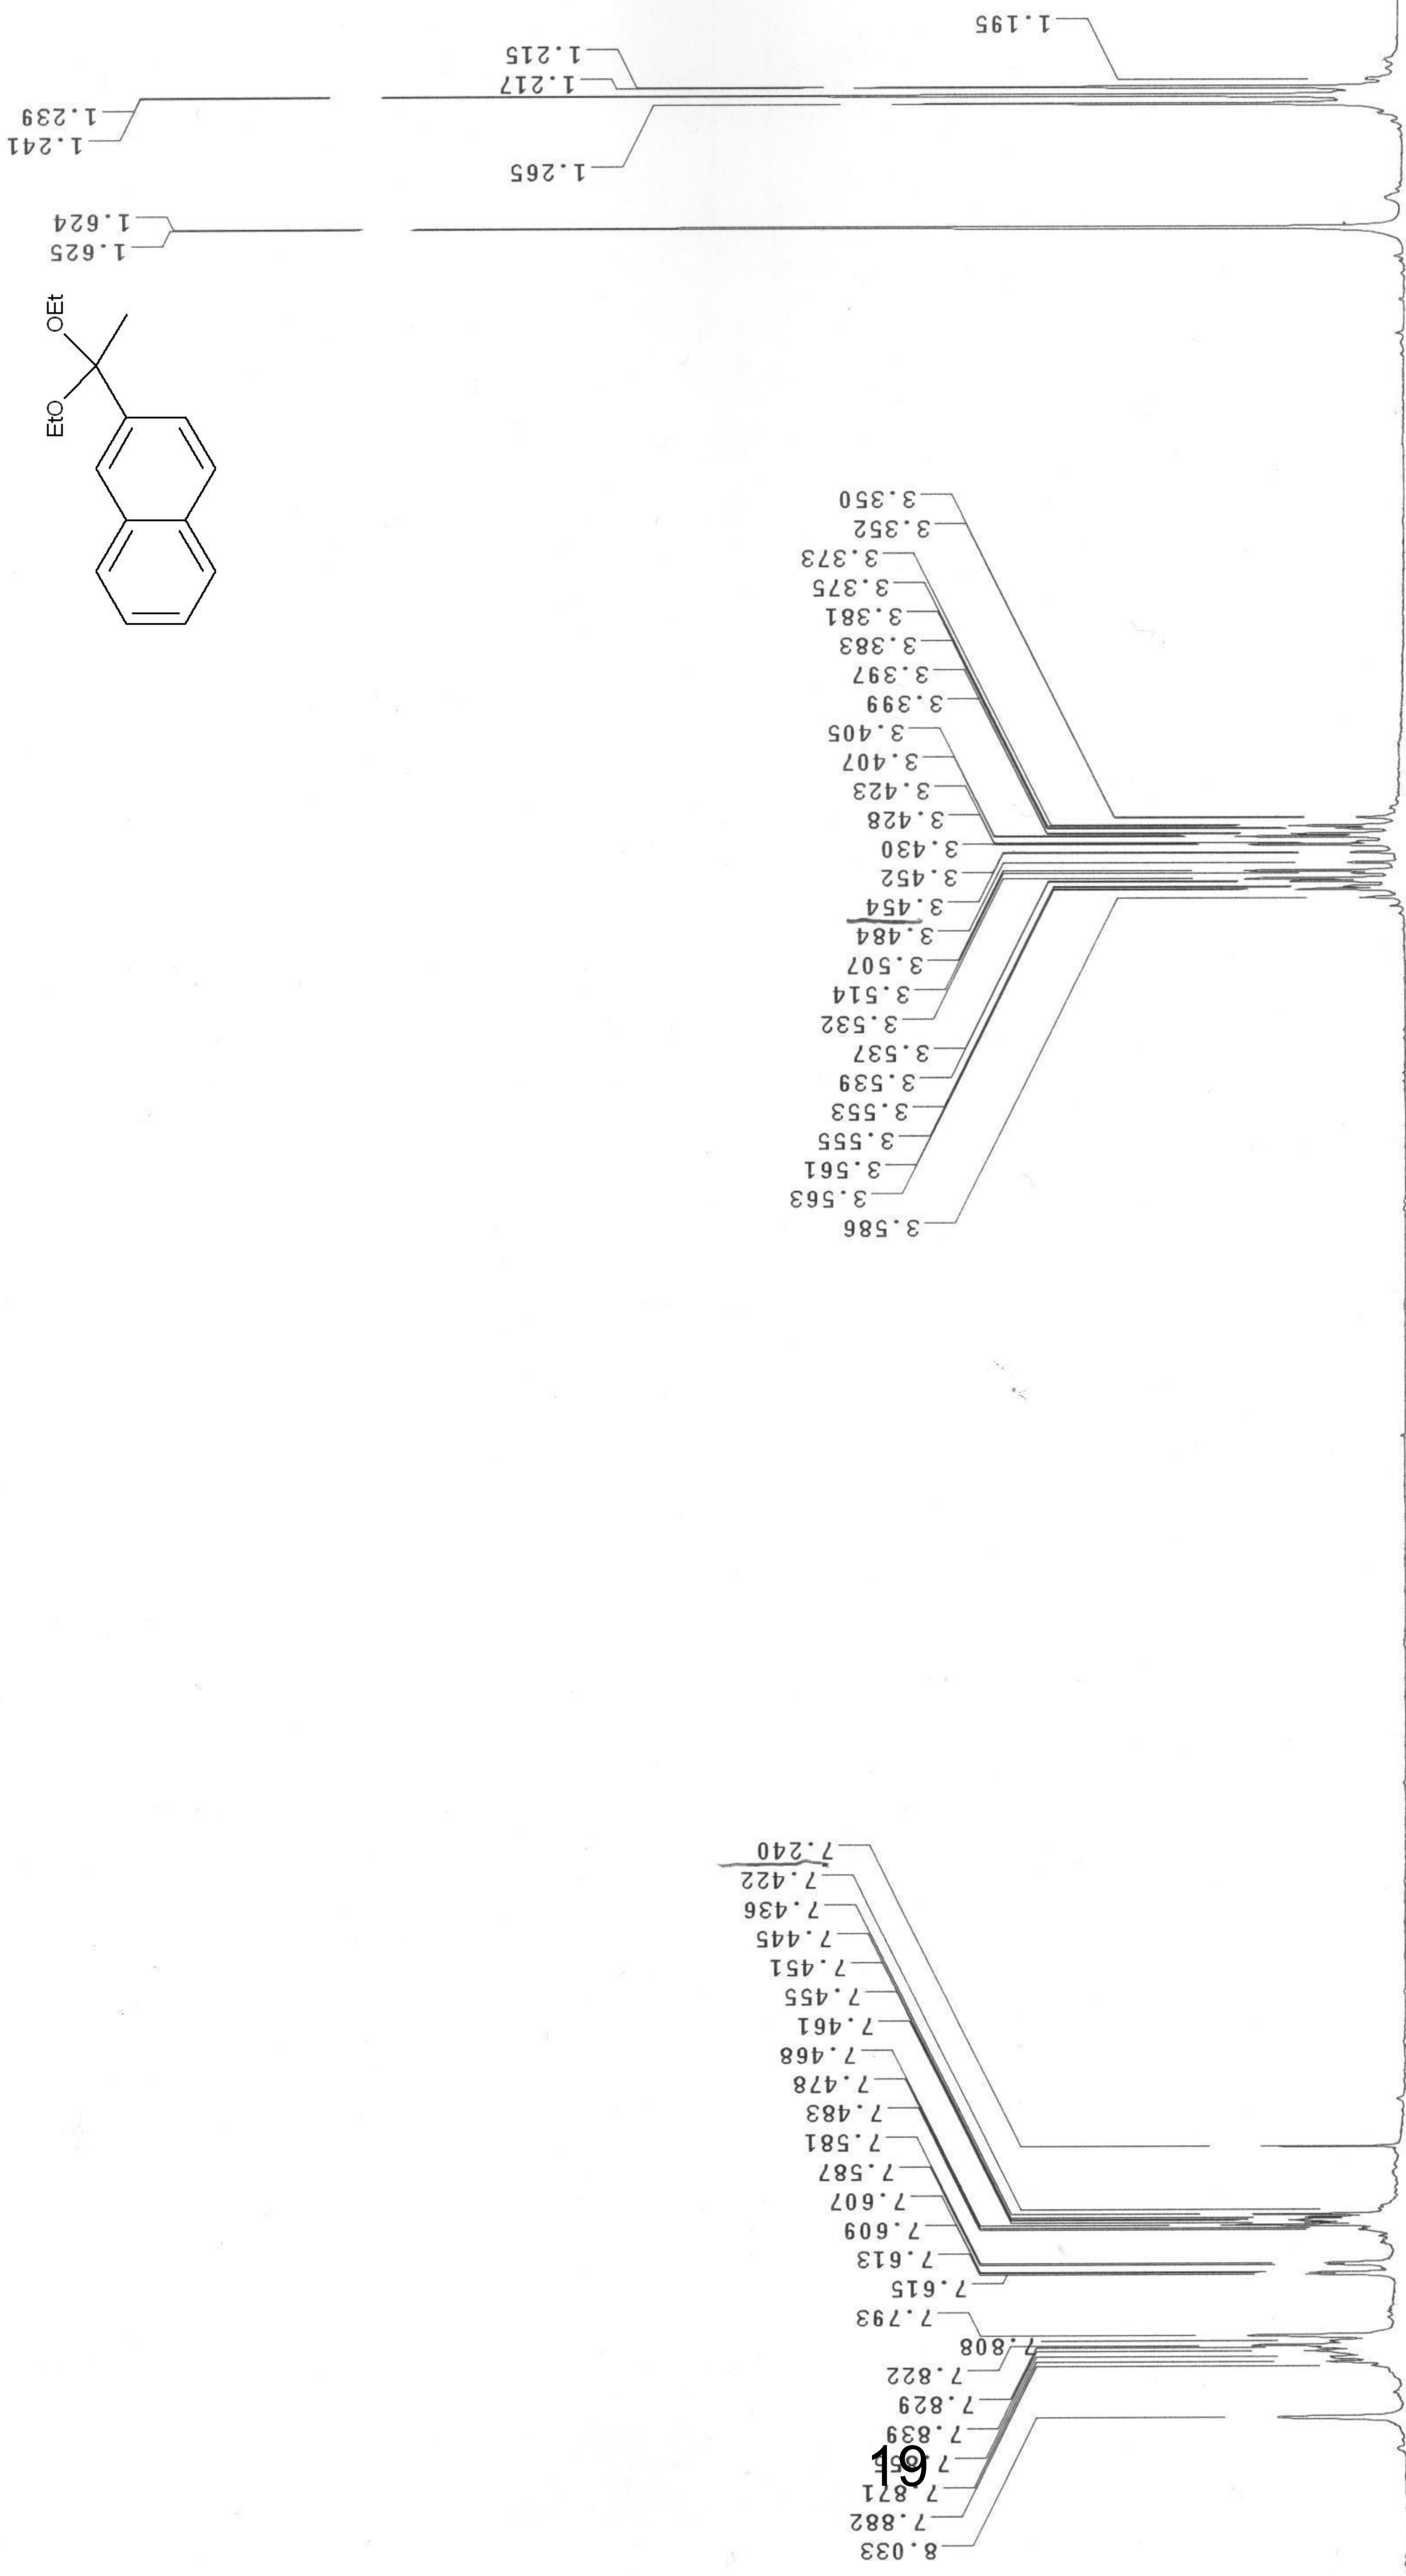

|                                                                                                                                                       |                                                                                               |
|-------------------------------------------------------------------------------------------------------------------------------------------------------|-----------------------------------------------------------------------------------------------|
| <p>STANDARD 1H OBSERVE</p> <p>Pulse Sequence: s2pu1</p> <p>Solvent: CDCl3</p> <p>Ambient temperature</p> <p>GEMINI-300 "Kmr300"</p>                   | <p>DATA PROCESSING</p> <p>H1, 300.0575478</p> <p>FT size 32768</p> <p>Total time 1 minute</p> |
| <p>6.00</p> <p>2.65</p>                                                                                                                               | <p>2.15</p> <p>2.03</p>                                                                       |
| <p>2</p>                                                                                                                                              | <p>3</p>                                                                                      |
| <p>4</p>                                                                                                                                              | <p>5</p>                                                                                      |
| <p>6</p>                                                                                                                                              | <p>7</p>                                                                                      |
| <p>8</p>                                                                                                                                              | <p>8</p>                                                                                      |
| <p>PULSE SEQUENCE</p> <p>Relax. delay 1.000 sec</p> <p>Pulse 88.7 degrees</p> <p>Acq. time 2.000 sec</p> <p>Width 4800.0 Hz</p> <p>28 repetitions</p> | <p>19</p>                                                                                     |

0Et\_naphthyl\_Ketone

Pulse Sequence: s2pu1

Solvent: CDCl3

Ambient temperature

File: 0Et\_naphthylketone\_13C

GEMINI-300BB "kmc300"

Pulse 42.3 degrees

Acq. time 1.815 sec

Width 18761.7 Hz

60 repetitions

OBSERVE C13, 75.4495404 MHz

DECOUPLE H1, 300.0590418 MHz

Power 37 dB

continuously on

WALTZ-16 modulated

DATA PROCESSING

Line broadening 1.0 Hz

FT size 131072

Total time 8 min, 29 sec

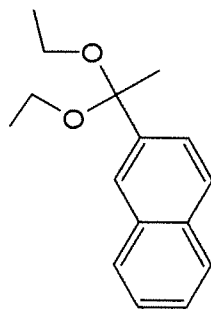

7c

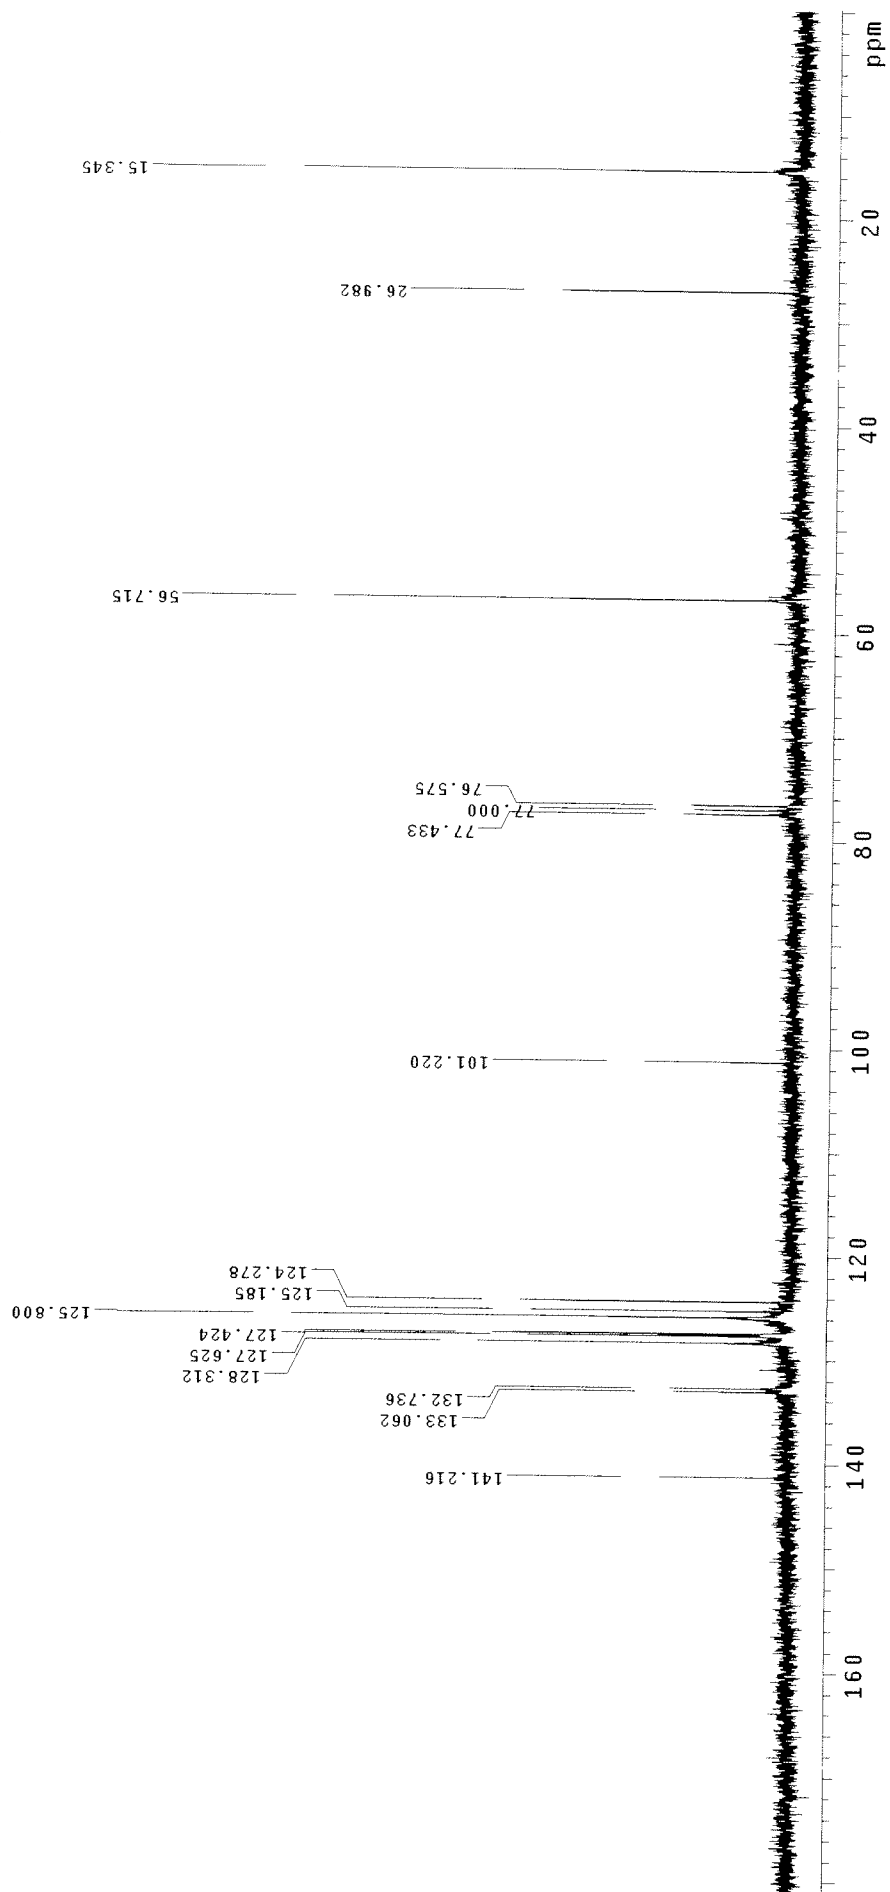

A25-clean

Pulse sequence: s2pu1

Solvent: CDCl3  
Ambient temperature  
GEMINI-300BB "kmr300"

Relax. delay 1.000 sec  
Pulse 9.0 degrees  
Acq. time 2.000 sec  
Width 4800.0 Hz  
Single scan  
OBSERVE H1, 300.0575469 MHZ  
DATA PROCESSING  
FT size 32768  
Total time 0 min, 4 sec

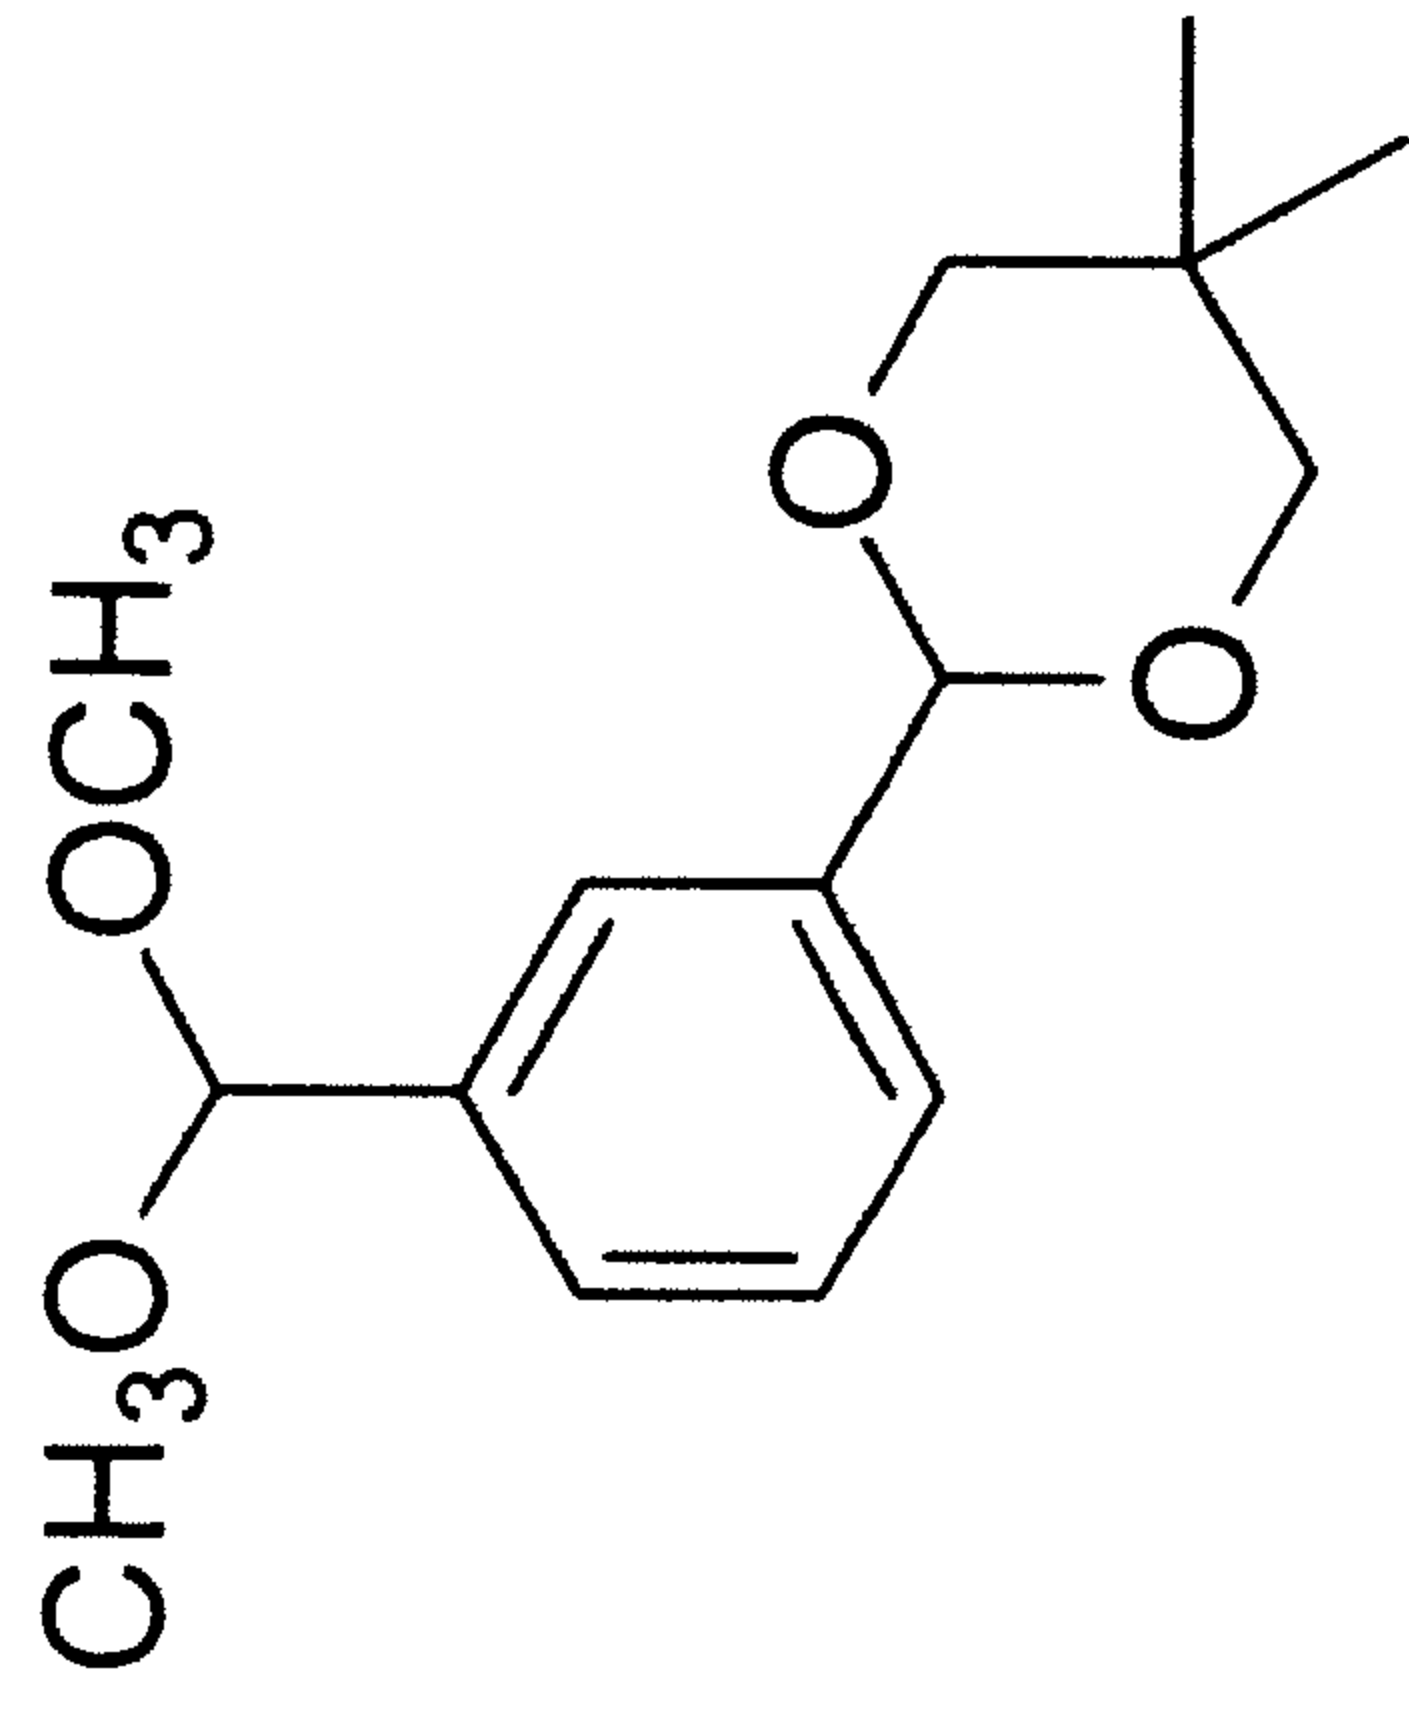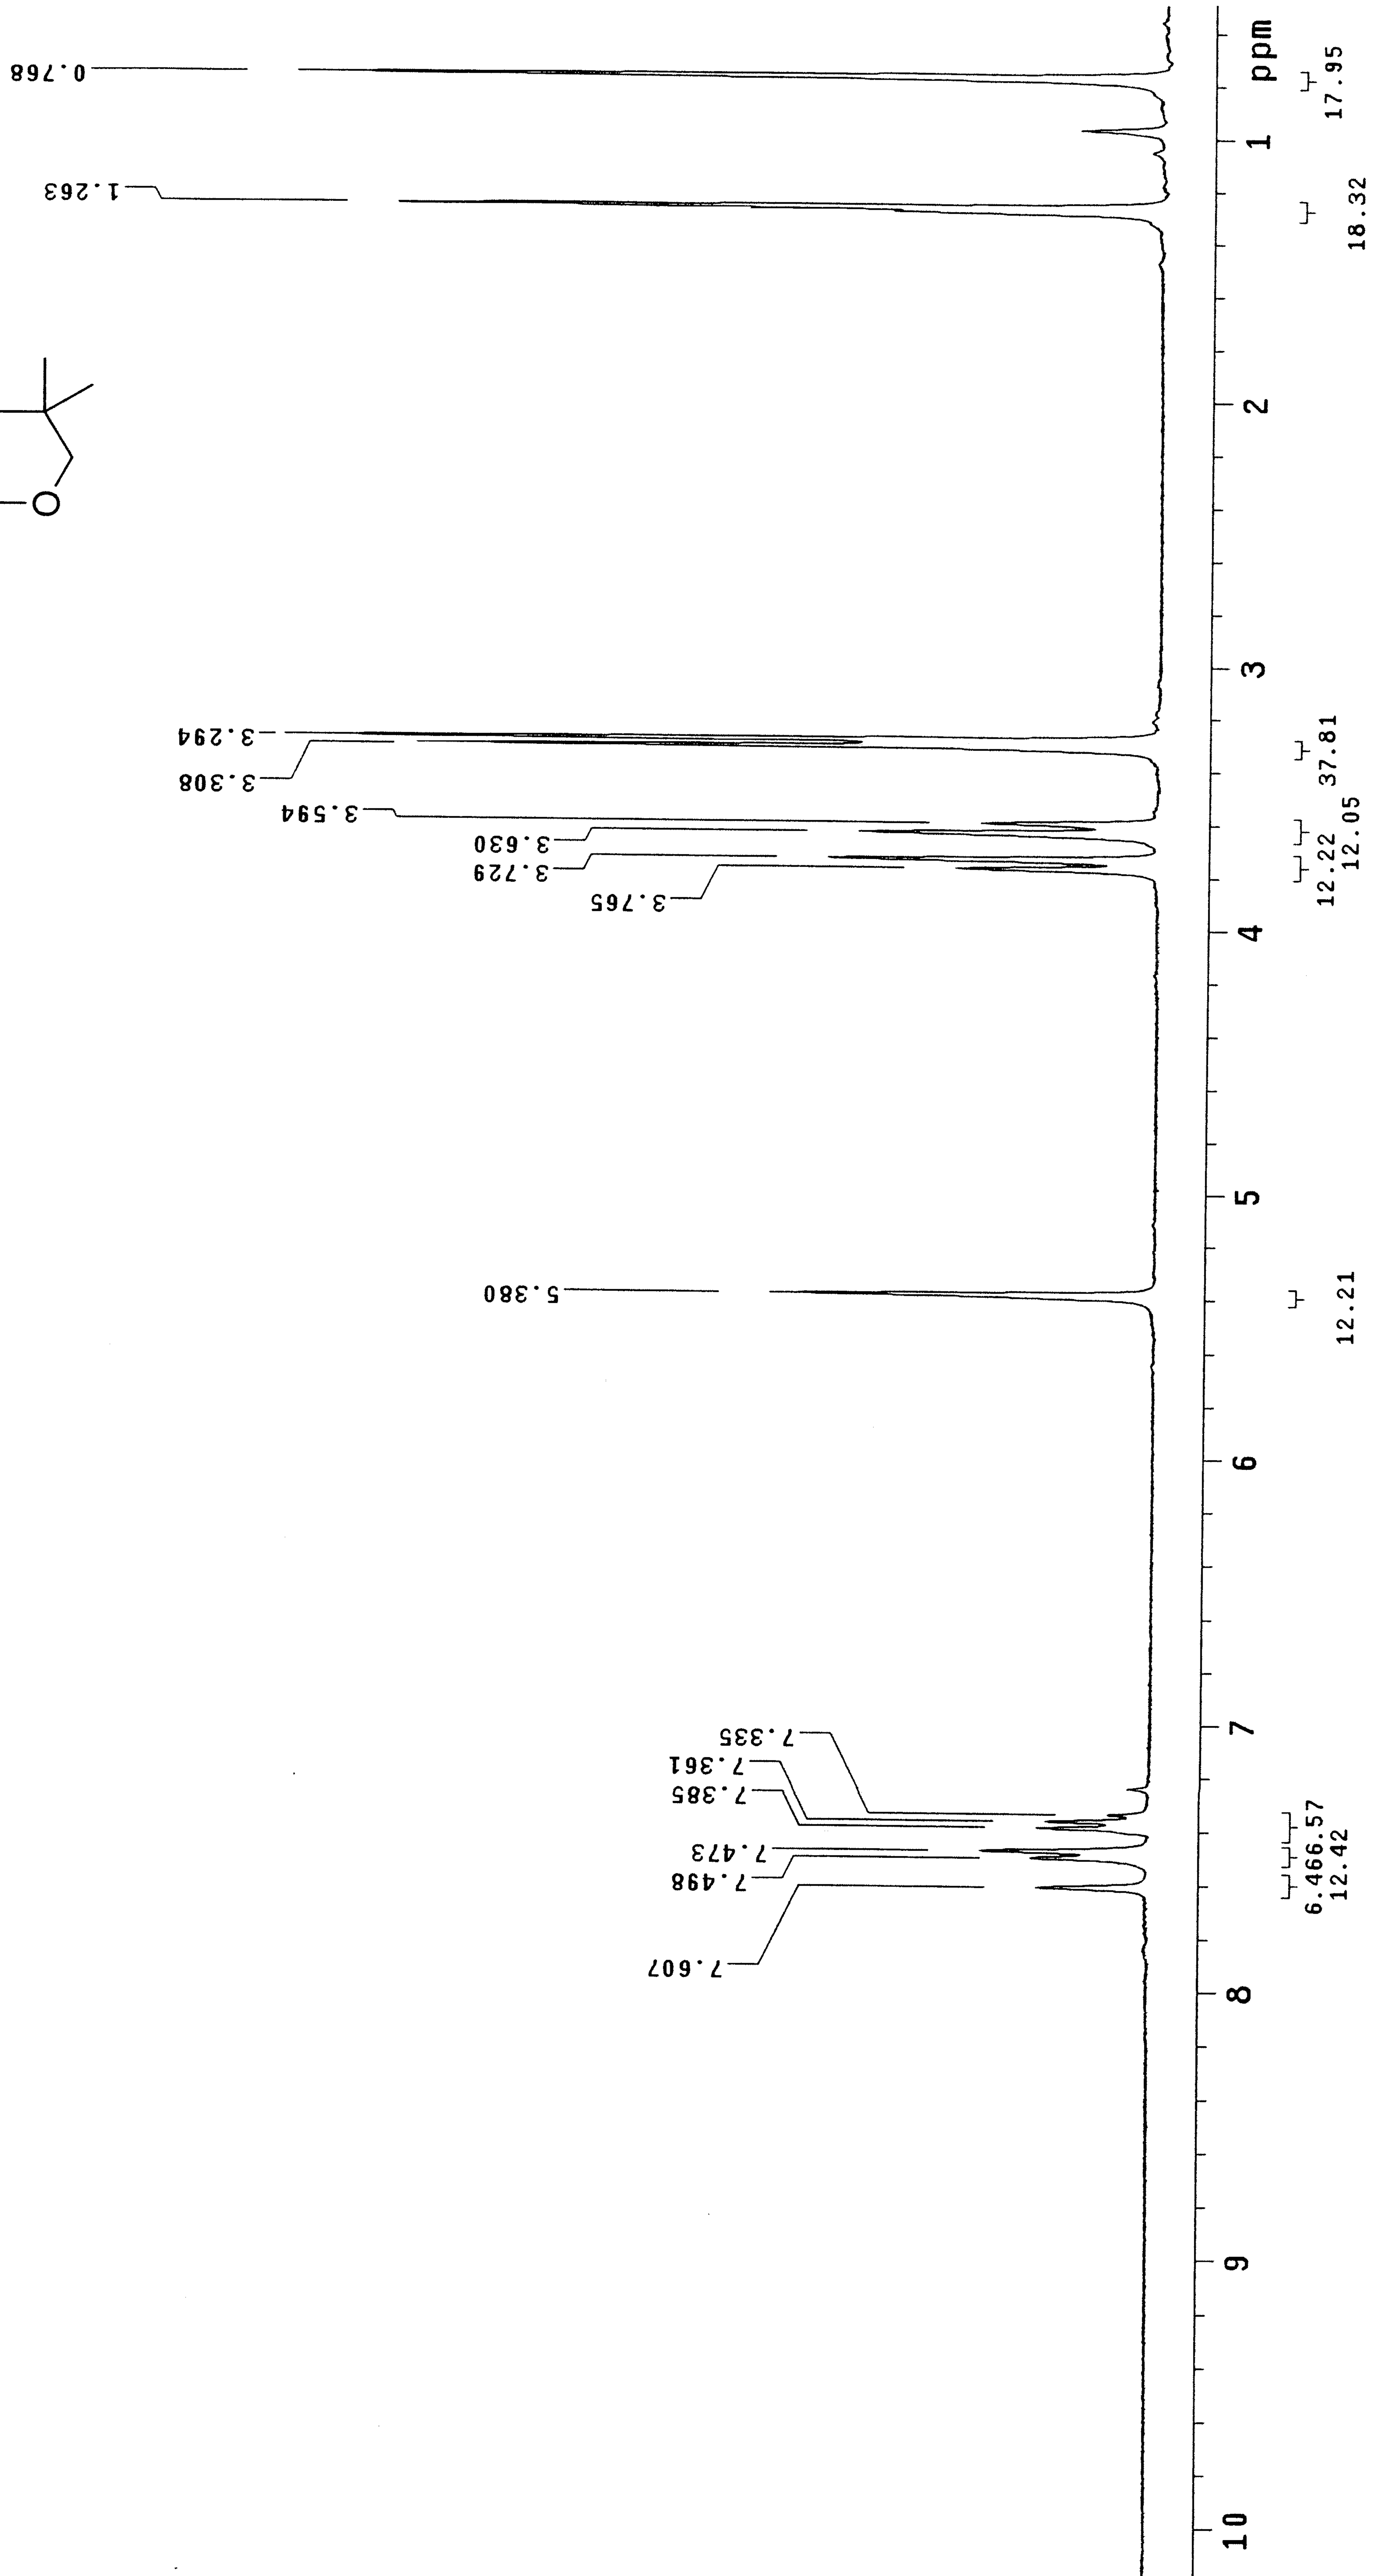

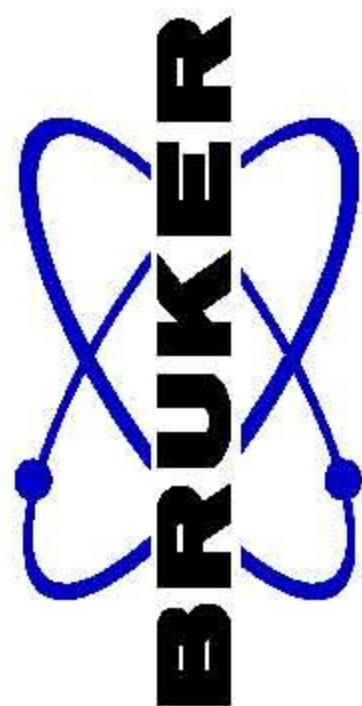

NAME A24b  
EXPNO 2  
PROCNO 1  
Date\_ 20100902  
Time\_ 1.36  
INSTRUM spect  
PROBHD 5 mm PABBO BB-  
PULPROG zgpg30  
TD 65536  
SOLVENT CDCl3  
NS 8192  
DS 4  
SWH 24038.461 Hz  
FIDRES 0.366798 Hz  
AQ 1.3631988 sec  
RG 114  
DW 20.800 usec  
DE 6.50 usec  
TE 296.0 K  
D1 2.0000000 sec  
D11 0.0300000 sec  
TD0 1

==== CHANNEL f1 =====  
NUC1 13C  
P1 9.60 usec  
PL1 -1.50 dB  
PL1W 51.80275345 W  
SFO1 100.6328888 MHz

==== CHANNEL f2 =====  
CPDPRG2 waltz16  
NUC2 1H  
PCPD2 90.00 usec  
PL2 -3.00 dB  
PL12 15.30 dB  
PL2W 23.05461311 W  
PL12W 0.34100270 W  
SFO2 400.1716007 MHz  
SI 32768  
SF 100.6228312 MHz  
WDW EM  
SSB 0  
LB 1.00 Hz  
GB 0  
PC 1.40

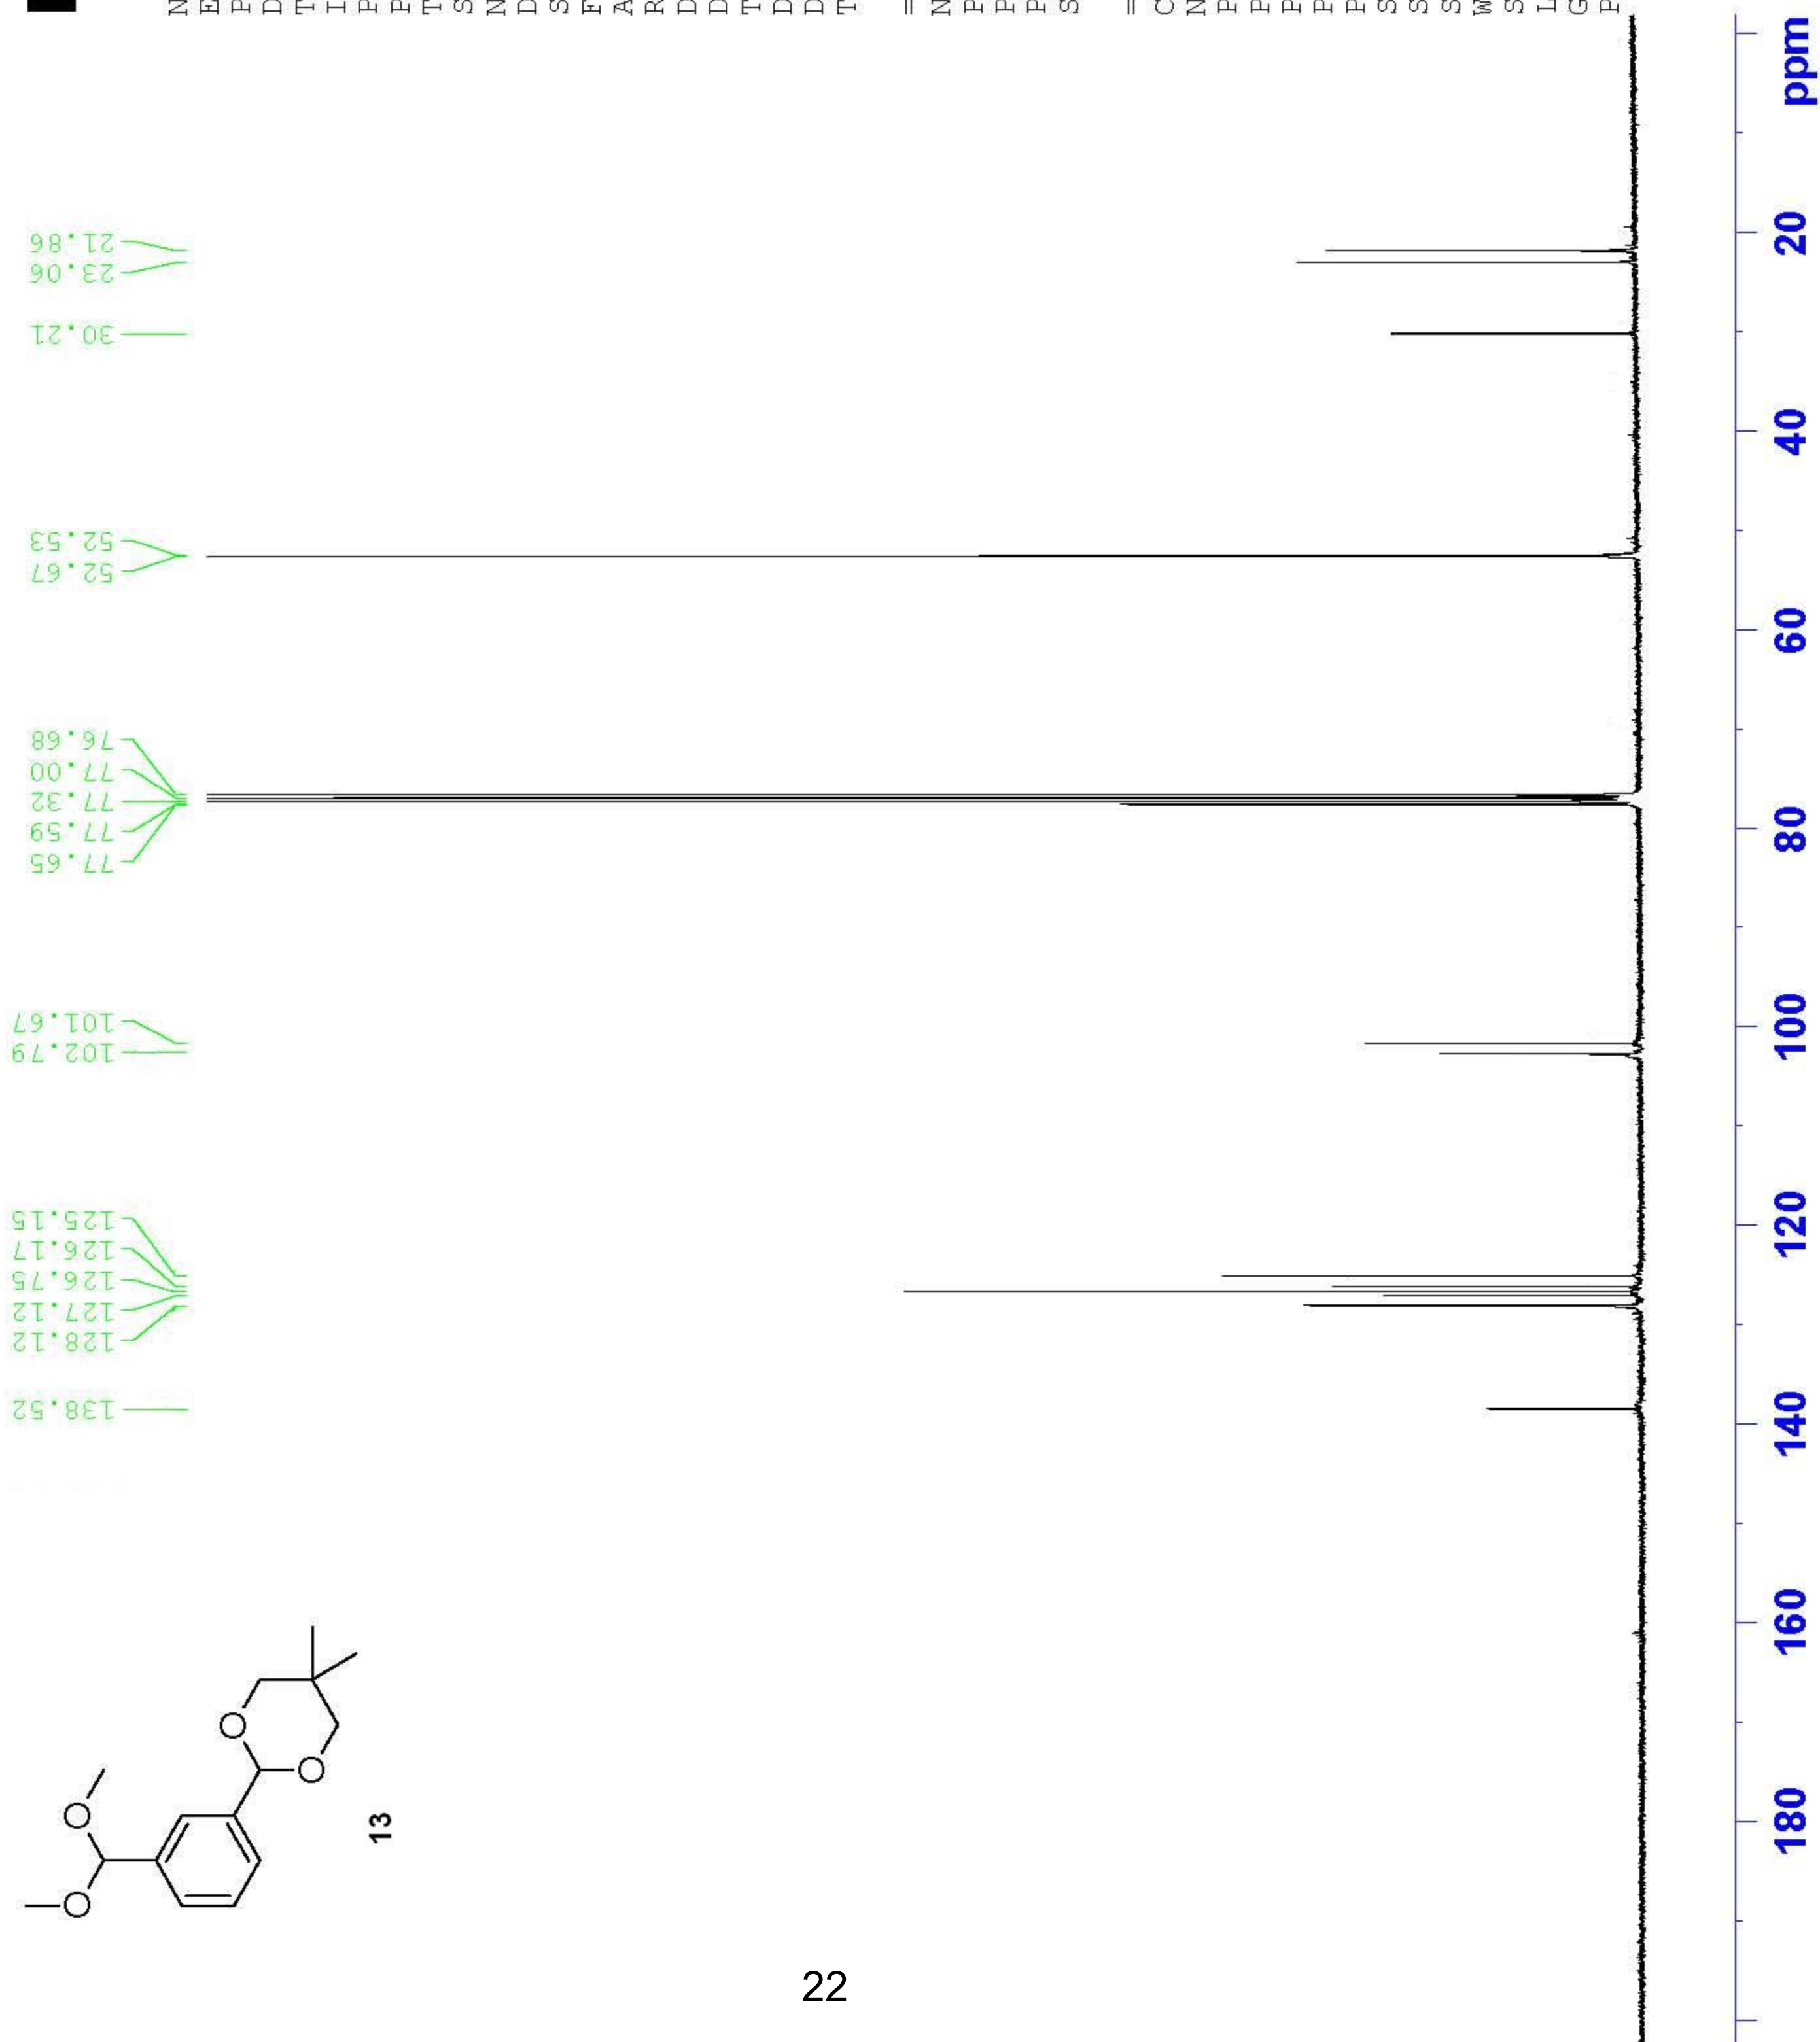

Supplement: c0gc00280a.pdf [file c0gc00280a.pdf]
